# Supplementary material for: A Preliminary Study of Biliary Microbiota in Patients with Bile Duct Stones or Distal Cholangiocarcinoma
Source: Biomed Res Int. 2019 Sep 25;2019:1092563. doi: 10.1155/2019/1092563 (PMC6778921; doi:10.1155/2019/1092563)
Supplement: Supplementary 5 — Table S3: Relative abundance of 252 bacterial species in patients with dCCA, the new onset of common bile duct stones and the recurrent choledocholithiasis. [file 1092563.f5.xlsx]

## Sheet: Sheet1
Table S3:Relative abundance of 252 bacterial species in patients with dCCA, the new onset of common bile duct stones and the recurrent choledocholithiasis
genus	C1	C2	C3	C4	C5	C6	C7	C8	C9	C10	C11	C12	C13	C14	C15	C16	C17	C18	C19	C20	C21	C22	C23	C24	C25	C26	C27	C28	C29	C30	C31	C32	C33	C34	C35	C36	C37	C38	C39	C40	C41	C42	C43	C44	P1	P2	P3	P4	P5
Abiotrophia	0	0	0	4.36395e-05	0.000567314	0	0.00096007	0	0.000741872	0	0	0	0	0.0018765	0	4.36395e-05	0.000349116	0	0.00196378	0.000261837	4.36395e-05	0	0	0.000174558	0	0	0	4.36395e-05	0.000174558	0	0	0	0	0.00148374	0.000480035	0	4.36395e-05	0.00226926	0.000174558	0.0100807	0.000218198	4.36395e-05	0.0016583	0.000130919	0	0	0	0.0023129	4.36395e-05
Acetivibrio	0	0	0	0.000741872	0.0484835	0	0	0	0.000480035	0	0	0.000130919	0.000174558	0.000130919	0	0.000654593	0.000654593	0.000436395	0.000872791	0	0	8.72791e-05	4.36395e-05	4.36395e-05	0.000174558	8.72791e-05	0	0.00244381	0.000130919	0	0	0	0	0	0	0	0	0	0	0	0	0	0	0	0	0.000436395	0.000130919	0.0014401	4.36395e-05
Achromobacter	0	0	0	8.72791e-05	0	0	0	0	0.000392756	0	0	8.72791e-05	0.000654593	0.000174558	0.000218198	0	0.000872791	0.00484399	4.36395e-05	8.72791e-05	0	0.000130919	0	0	4.36395e-05	0	0	0	0	0	0	0	0	0.000392756	8.72791e-05	0	0	4.36395e-05	0	0	0	0.000174558	0	0	0	0.000130919	4.36395e-05	0.00314205	0.000218198
Acidovorax	0.00226926	0	0	4.36395e-05	0.00301113	0	0	0	0.0014401	0	0	4.36395e-05	8.72791e-05	0	4.36395e-05	0	0	0.000654593	0	4.36395e-05	0	4.36395e-05	0	0	0	0	0	0	0	0	0	0	0	0	0.000174558	0	0	0	0	4.36395e-05	0	0	0	0	0	0	4.36395e-05	4.36395e-05	0
Acinetobacter	0.0465634	0.000523674	0.000130919	0.00305477	0.270521	0.00152738	4.36395e-05	0	0.0146192	4.36395e-05	0	0.00100371	0.00336024	0.00157102	0.000872791	0.00205106	0.00366572	0.0407157	0.000349116	0.000174558	0.000654593	0.00135283	0.000567314	4.36395e-05	0.000523674	8.72791e-05	0	0.00113463	0.000174558	0.003753	0.000436395	0.00850971	0.000174558	0.00301113	0.038621	0.000305477	8.72791e-05	0.0944796	0.0128737	0.0112154	0.00170194	0.00410212	0.00213834	0.000654593	0.00122191	0.0079424	0.00881519	0.0240454	0.22422
Actinomyces	0.000654593	0	0	0.000130919	0.00610954	0.000130919	0.00222562	0	0.0091643	4.36395e-05	0	0.000130919	0.000698233	8.72791e-05	0.000741872	0.000218198	0.00113463	0.000480035	0.00240017	0.000610954	0.000218198	0.000130919	4.36395e-05	0.0051931	0.000130919	0	0	0.00122191	0.0129609	0.000610954	0.00384028	0.00130919	0	0.00327297	0.00558586	8.72791e-05	0.00423304	0.0358281	0.00218198	0.0051931	0.000436395	0.00096007	0.0098189	0.000130919	0.000523674	0.000480035	0.0425049	8.72791e-05	0.00152738
Actinotalea	4.36395e-05	0	0	0	0	0	0	0	0	0	0	0	0	0	0	0	0	0	0	0	0	0	0	0	0	0	0	0	0	0	0	0	0	0.0060659	0	0	0	0	0	0	0	0	0	0	0	0	0	0.000174558	0
Aeromonas	4.36395e-05	0	0	0	4.36395e-05	0	0.000567314	8.72791e-05	0.000785512	4.36395e-05	0	0.000785512	0.176347	0.000261837	0.000349116	0.00100371	0.000741872	0.00096007	0.00244381	0.000392756	0.000174558	0.000130919	0.000130919	0.000130919	0.000523674	0.000523674	0.15396	0.00580406	0.000392756	4.36395e-05	4.36395e-05	0	0.00174558	0.000130919	0	0	0	0	0.00789876	0.000174558	0	0.000130919	0	4.36395e-05	0.0115208	0.000567314	0.00122191	0.00100371	0.00100371
Aggregatibacter	0	0	0	0	0	4.36395e-05	0.02518	4.36395e-05	0.000261837	8.72791e-05	4.36395e-05	0.000130919	4.36395e-05	4.36395e-05	0	0	0.000130919	0.000261837	0.000741872	0.0039712	0	4.36395e-05	0	4.36395e-05	0.000130919	0	4.36395e-05	0.00109099	0	0.000480035	0	0.00261837	4.36395e-05	0.000698233	0.00589134	4.36395e-05	0	0.00139647	0.00183286	0.00248745	0.000261837	0.000480035	0.000610954	0.000130919	4.36395e-05	0	0	0	0.000174558
Akkermansia	0.00672049	0	0.000174558	0.0020947	0.00170194	0.000436395	0.000130919	0	0.0142701	4.36395e-05	8.72791e-05	0	0.000698233	0.000829151	0.000436395	0.00126555	0.00349116	0.00501855	0.0114336	4.36395e-05	0.000261837	4.36395e-05	0.000218198	0.000218198	0.00109099	0.000261837	0	0.00968798	0.000174558	0	0	0	0	0	0	0	0	0	0	0	0	0.000174558	0	0	0	0.00174558	0.00327297	0.00222562	0.000392756
Alistipes	0.00244381	0	0	0.000741872	0.00139647	0.000130919	0	0	0.000174558	0	0	0	0.000785512	0.000698233	0	0.00122191	0.0035348	0.00327297	0.00196378	0	0	0.000130919	0.000130919	0	0.000436395	0	0	0.00488763	8.72791e-05	0.000130919	0	0	0	0	0	0	0	0	0	0	0	0	0	0	0	0.000218198	4.36395e-05	0.00475671	0.000218198
Alkanindiges	0	0	0	0	0	0	0	0	0	0	0	0	0	0	0.000130919	0	0	0	0	0	0	0	0	0	4.36395e-05	0	0	0	0	0	4.36395e-05	0	0	0	0	0	0	0	0	0	0	0	0	0	0	0	0	0	0
Allisonella	0.00296749	0	0	8.72791e-05	0	0	0	0	0	0	0	0	4.36395e-05	8.72791e-05	4.36395e-05	8.72791e-05	8.72791e-05	0	0	0	0	0	0	0	0	0	0	0	0	0	0	0	0	0	0	0	0	0	0	0	0	0	0	0	0	0	0	0	0
Allobaculum	0	0	0	0	0	0	0	0	0	0	0	0	0	0	0	0	0	0	0.00192014	0	0.000392756	0.000130919	0.000261837	4.36395e-05	0.000174558	0	0	0.00458215	0	0	0	0	0	0	0	0	0	0	0	0	0	0	0	0	0	0	0	0	0
Alloprevotella	0.000610954	0	0	0.000174558	8.72791e-05	0	0.00139647	0	4.36395e-05	0	8.72791e-05	0	0.000261837	0.000261837	0.00549858	0.000218198	0.000130919	0.000480035	0.00152738	0.00130919	4.36395e-05	4.36395e-05	0.00096007	0.00920794	0.00113463	4.36395e-05	0.000130919	0.00580406	8.72791e-05	0.00196378	4.36395e-05	0.00951342	8.72791e-05	0.00357844	0.0258782	0.000218198	0.000130919	0.00379664	0.0136592	0.0123063	0.00261837	0.003753	0.0016583	0.000349116	0	0.000305477	0.000392756	0	0.000218198
Alloscardovia	0	0	0	0	0	8.72791e-05	0	0	0.000261837	0	0	0	0	0	0	0	0	0	0	0	4.36395e-05	0	0	0.000261837	0	0	0	0	4.36395e-05	0	0	0	0	0	0	0	0	0	8.72791e-05	0.00602226	0	0	0	0	0	0	0	0	0
Aminicenantes_genera_incertae_sedis	0	0	0	4.36395e-05	0	0	0	0	0	0	0	0	0	0	0	0	0	0	0	0	0	0	0	0	0	0	0	0	0	0	0	0	0	0	0	0	0	0	0	0	0	0	0	0	0	0	0.00096007	0	0
Anaerococcus	8.72791e-05	0	0	0	0.000218198	0	0	0	0.000174558	0	0	0	8.72791e-05	4.36395e-05	0	4.36395e-05	0	0.000392756	0	0	0	0	0	0	0	0	0	0	0	0	0	0	0	0	8.72791e-05	0	0	0	0	0	0	0	0	0	0	0.000174558	0.000610954	0	0
Anaeroglobus	0	0	0	0	0	0	0	0	0	0	0	0	0	4.36395e-05	0	0	0	4.36395e-05	0.000130919	8.72791e-05	4.36395e-05	0	0	0	4.36395e-05	0	0	0.000174558	0	0	0	0	0	0	0.000130919	0	4.36395e-05	0	0	0.000218198	4.36395e-05	0	0	0	4.36395e-05	0	0	0	0
Anaeroplasma	0	0	0	0	0	0	0	0	0	0	0	0	0	0	0	0	0	0	4.36395e-05	0	0	0	4.36395e-05	0	0	4.36395e-05	0	0.000261837	0	0	0	0	0	0	0	0	0	0	0	0	0	0	0	0	0	0	0	0	0
Anaerostipes	0.00117827	0	0	0.000261837	0.00296749	4.36395e-05	0	0	0.000130919	0	0	4.36395e-05	0.000218198	0.000567314	0	0.000261837	0.00192014	0.00266201	0	0	0	0	0	0	0	0	0	4.36395e-05	0	0	0	0	0	0	0	0	0	0	0	0	0	0	0	0	0	0.000741872	0.000218198	0.00288021	0
Anaerotruncus	0	0	0	0	0	0	0	0	0	0	0	0	0	0	0	8.72791e-05	0.000392756	0.000305477	8.72791e-05	0	8.72791e-05	0	0	0	0	4.36395e-05	0	0.000436395	0	0	0	0	0	0.000130919	0	0	0	0	0	0	0	0	0	0	0	0	0	0	0
Anaerovorax	0	0	0	0	0	0	0.000174558	0	0.000392756	0	0	0	0	8.72791e-05	0	0	0	4.36395e-05	0.000872791	0	0.00192014	0	0	0	0	4.36395e-05	0	0.00104735	0.000305477	0	0	0.000130919	0	0	0.000698233	0	0	0.000130919	0.000218198	0.000218198	0	0	0.000174558	0	0	0	0	0	0
Anoxybacillus	0.00549858	0	0	0.000392756	0.0016583	0.000261837	4.36395e-05	0	0.0151429	0	0	0.000174558	0.00109099	0.00475671	0.00379664	0.00096007	0.00528038	0.0183286	0.000349116	0	8.72791e-05	0	8.72791e-05	4.36395e-05	0.000130919	0	0	0.000523674	4.36395e-05	0.00205106	4.36395e-05	0.000654593	8.72791e-05	0	0.00117827	0.000130919	0	0.000174558	0.000261837	0.0014401	0	0.00100371	8.72791e-05	0	0	0.00327297	0.0107353	0.0102553	0.00091643
Aquabacterium	0.00113463	0	0	0.000480035	0.000654593	0.000349116	0.000130919	0	0.00274929	4.36395e-05	0	4.36395e-05	0.00235654	0.000305477	0.000130919	8.72791e-05	0.000741872	0.0020947	0	0.000130919	0	0	0	0	0	0	0	4.36395e-05	0	0.000130919	0	0.000480035	4.36395e-05	0	0.000523674	4.36395e-05	0	0.000218198	0.000567314	0.000523674	0.000130919	4.36395e-05	8.72791e-05	0	0	0.00305477	0.00693869	0.00658957	0.000130919
Arthrobacter	0	0	0	0	0	0	0	0	0	0	0	0	0	0	0	0	0	0	4.36395e-05	0	0	0	0	0	0	0	0	0	0	0	0	0	0	0	0	0	0	0	0	0	0	0	0	0	0	0	0.000523674	0	0
Atopobium	0.00510583	0	0.000130919	0	0.000698233	4.36395e-05	0.00528038	0	0.00357844	0	0	0.000261837	0	0.000174558	0.00192014	8.72791e-05	0.00130919	0.000261837	0.000610954	0.00091643	4.36395e-05	4.36395e-05	0	0.0149247	4.36395e-05	0.000174558	0	0.000436395	0.0250927	0	4.36395e-05	0.000567314	0	8.72791e-05	0.00392756	4.36395e-05	8.72791e-05	0.0153611	0.00183286	0.0205979	0.000392756	8.72791e-05	0.00104735	8.72791e-05	4.36395e-05	4.36395e-05	0.00506219	0	0.000610954
Azospira	0	0	0	0.000392756	0	0	0	0	0	0	0	0	0	0	4.36395e-05	0	0	0.000480035	0	0	0	0	0	0	0	0	0	0	0	0	0	0	0	4.36395e-05	0	0	0	0	0	0	0	0	0	0	0	0	0.000349116	0	0
Bacteroides	0.0587388	4.36395e-05	0.000174558	0.0202487	0.0276238	0.00628409	0.000130919	4.36395e-05	0.0147065	0	4.36395e-05	0.000305477	0.0129173	0.0234344	0.000785512	0.0207288	0.0760201	0.0631901	0.00955706	0.000436395	0.000785512	0.000785512	0.000523674	0.00130919	0.0018765	0.00130919	0.000523674	0.0299804	0.007506	0.000610954	0	0	0	0.000261837	0.000654593	0	0	0	0.000218198	4.36395e-05	0	0.000174558	0	0	0	0.00593498	0.00912066	0.0170631	0.00152738
Barnesiella	0.00152738	0	4.36395e-05	0.00392756	0.00213834	0.000261837	4.36395e-05	4.36395e-05	0.00497491	0	0	0	0.000567314	0.00174558	4.36395e-05	0.00100371	0.00196378	0.00720052	0.0166703	4.36395e-05	0.000654593	0.000741872	0.000654593	0.000785512	0.00152738	0.000349116	4.36395e-05	0.043465	0.000654593	0	0	0	0	0	0	0	0	0	0.000610954	0	0	0	0	0	0	0.000785512	0.00235654	0.00130919	0.000829151
Bifidobacterium	0.0227362	4.36395e-05	0.000174558	0.0204233	0.100676	0.00597862	0.000523674	0	0.0153611	0.000174558	0	0.000392756	0.0152302	0.0313332	0.00226926	0.0285403	0.0807331	0.0703906	0.00222562	0.000218198	4.36395e-05	0.000130919	8.72791e-05	4.36395e-05	8.72791e-05	0	0	0.000130919	0.000436395	0	0	0	8.72791e-05	0	0.000218198	0	0	4.36395e-05	0	0	0	0	0	0	0.000349116	0.00580406	0.0133101	0.0223871	0.00122191
Bilophila	0	0	0	0.000567314	0.000305477	0	0	0	0	0	0	0	0.000130919	0.000305477	0	0.000480035	0	0.000436395	0.0409775	0.000436395	0.000261837	0.000392756	0.000261837	4.36395e-05	0.000654593	4.36395e-05	0.000174558	0.00436395	0.000305477	0	0	0	0	0	0	0	0	0	0	0.000305477	0	0	0	0	0	0.000741872	0	0.000130919	0
Blastococcus	0	0	0	0	0	0	0	0	0	0	0	0	0	0	0	0	0	0	0	0	0	0	0	0	0	0	0	0	0	0	0	0	0	0	0.0072878	0	4.36395e-05	0.00170194	0	0	0	0	0	0	0	0	0	0	0
Blautia	0.00248745	0	0	0.00218198	0.000698233	0.000436395	0	0	0.00100371	4.36395e-05	0	4.36395e-05	0.000567314	0.00161466	8.72791e-05	0.00148374	0.00440759	0.00445123	0.00100371	0	4.36395e-05	0.000130919	0.000130919	0	8.72791e-05	0	0	0.00109099	0.000130919	0	0	0	0	0	0	0	0	0	0	0	0	0	0	0	0	0.000218198	0.0016583	0.00253109	4.36395e-05
Bosea	0	0	0	0	0	0	0	0	0.000218198	0	0	0	4.36395e-05	0	0	0	0	0.00096007	0	0	8.72791e-05	0	0	0	0	0	0	0	4.36395e-05	0	0	0	0	0	0	0	0	0	0	0	0	0	0	0	0	0.000785512	4.36395e-05	0.000654593	4.36395e-05
Brevibacterium	0	0	0	0	0	0	0	0	0	0	0	0	4.36395e-05	0	0	0	0	0	0	0	0	0	0	0	0	0	0	0	0	0	0	0	0	0	0	0	0	0	0	0	0	0	0	0	0	0	0	0.000523674	4.36395e-05
Brevundimonas	0.00226926	0	0	0.000698233	0.0147065	0.000261837	0	4.36395e-05	0.00205106	0	0	0.000174558	0.000218198	0.000218198	0.000392756	0.000436395	8.72791e-05	0.00855335	0.000436395	4.36395e-05	4.36395e-05	0	0	4.36395e-05	0.000130919	4.36395e-05	0	0.000741872	4.36395e-05	0	0	0.000436395	0	0.000130919	0.000567314	4.36395e-05	0	0.000436395	0.000305477	0.000174558	4.36395e-05	0.000218198	0	0	0	0.00148374	0.00344752	0.00301113	4.36395e-05
Bulleidia	0	0	0	0	0	0	4.36395e-05	0	0	0	0	0	0	0	0	0	0	0	0.000174558	0	0.00318569	0	0	0.000130919	0	0	0	0	0	0	0	0	0	0	0	0	0	0	0	0	0	0	0	0	0	0	0	0	0
Butyricicoccus	0.00200742	0	4.36395e-05	0.000392756	0.00091643	0.000523674	0	0	0.000174558	4.36395e-05	0	4.36395e-05	8.72791e-05	0.00109099	4.36395e-05	0.000872791	0.00362208	0.00266201	0.00113463	0	0	0	0	0.000130919	4.36395e-05	0	0	0.00274929	4.36395e-05	0	0	0	0	0	0	0	0	0	0	0	0	0	0	0	0	0	0.00113463	0.0014401	0
Butyricimonas	0	0	0	0	0.000218198	0	0	0	0	0	0	0	0	0	0	4.36395e-05	0	4.36395e-05	0.000349116	4.36395e-05	0	8.72791e-05	0.000130919	4.36395e-05	0	0	0	0.000785512	4.36395e-05	0	0	0	0	0	0	0	0	0	0	0	0	0	0	0	0	0	0	0	0
Butyrivibrio	0	0	0	0	0	0	0	0	0	0	0	0	0	0	0	0	0	0	0	0.000261837	8.72791e-05	0	0	0.00174558	0	0	0	0.000218198	0.000305477	0	0	0.000130919	0	0	0.000698233	0	0	0.00104735	8.72791e-05	0	8.72791e-05	0.000218198	0	0	0	0	8.72791e-05	0	0
Caldisericum	0	0	0	0	0	0	0	0	0	0	0	0	0	0	0	0	0	0.00183286	0	0	0	0	0	0	0	0	0	0	0	0	0	0	0	0	0	0	0	0	0	0	0	0	0	0	0	0	0	0	0
Campylobacter	0	0	0	0.000349116	0	4.36395e-05	0.00122191	0	0.000698233	0	0	0	0.00340388	0.00480035	0.000218198	0.00523674	0.0158848	0.0114336	0.00126555	0.000610954	4.36395e-05	0	0	0.00650229	4.36395e-05	4.36395e-05	0.000523674	0.000392756	0.00274929	0	0	0.000785512	0	0.000480035	0.00261837	8.72791e-05	0	0.00122191	0.00270565	0.00226926	0.000480035	0.000349116	0.000130919	4.36395e-05	0.00091643	0	0.00257473	0.000174558	0.000349116
Candidatus_Brocadia	0	0	0	0	0	0	0	0	0	0	0	0	0	0	0	0	0	0	0	0	0	0	0	0	0	0	0	0	0	0	0	0	0	0	0	0	0	0	0	0	0	0	0	0	0	0.000480035	0	0	0
Candidatus_Kuenenia	0	0	0	0	0	0	0	0	0	0	0	0	0	0	0	0	0	0	0	0	0	0	0	0	0	0	0	0	0	0	0	0	0	0	0	0	0	0	4.36395e-05	0	0	4.36395e-05	0	0	0	0	0	0.000523674	0
Capnocytophaga	0	0	0	0	0.000654593	4.36395e-05	0.00344752	0	8.72791e-05	0	4.36395e-05	0	0.000305477	0	0	0	0	0.000130919	0.00283657	0.00357844	0.000436395	4.36395e-05	8.72791e-05	0.0327297	0	0.000261837	0	0.000785512	0.000523674	0.000130919	4.36395e-05	0.00253109	4.36395e-05	0.0054113	0.00432031	0	0	0.00270565	0.00235654	0.00370936	0.000392756	0.000305477	0.000698233	0	0	0	4.36395e-05	0.000174558	0
Cardiobacterium	0	0	0	0	0	0	0	0	0	0	0	0	0	4.36395e-05	4.36395e-05	0	0	0	0	0	0	0	0	0.000130919	0	0	0	0.000392756	0.000130919	4.36395e-05	0	0.000305477	0	8.72791e-05	0.000174558	0	0	4.36395e-05	0	0.000305477	4.36395e-05	0	0.000130919	0	0	0	0	0	0
Catonella	0.000698233	0	0	0	0	0	0.00183286	0	0.0016583	0	0	0.000130919	0	0	0	4.36395e-05	8.72791e-05	4.36395e-05	0.000741872	0.000174558	0.000130919	0	0	0.00641501	8.72791e-05	8.72791e-05	0	0	0.00161466	4.36395e-05	4.36395e-05	0.000654593	0	0.00113463	0.00170194	0	0	0.00192014	0.00117827	0.00117827	0.000130919	0.00096007	0.0020947	4.36395e-05	0	0	0.00244381	0	0.000174558
Caulobacter	0	0	0	4.36395e-05	8.72791e-05	0	0	0	0.00109099	0	0	0	0.000218198	0.000218198	8.72791e-05	0.000392756	0.000305477	0.000436395	0	0	0	0	0	0	0	0	0	0	0	0	0	0.000174558	0	0	0	0	0	0	0	0	0	0	0	0	0	4.36395e-05	0.00261837	0.00091643	0
Chelatococcus	0	0	0	0	0	0	0	0	0	0	0	0	0	0	0	0	0	0	0	0	0	0	0	0	0	0	0	0	0	0	0	0	0	0	0	0	0	0	0	0	0	0	0	0	0	0	0.000130919	0	0
Citrobacter	0.00091643	8.72791e-05	4.36395e-05	0.000829151	0.0109535	0.000305477	0	0	0.00152738	0.000349116	0.000218198	0.000392756	0.000785512	0.00091643	0.000174558	0.0497491	0.00645865	0.00292385	0.00318569	0.0033166	0.00222562	0.000829151	0.000218198	0.00440759	0.00170194	0.056295	0.00170194	0.00528038	0.000130919	0	4.36395e-05	0	0.000218198	0.00196378	4.36395e-05	0	8.72791e-05	0.000130919	0.00113463	0	0	0.000174558	0	4.36395e-05	0.000392756	0.00292385	0.00113463	0.00349116	0.00789876
Cloacibacterium	0	0	0	0	0	0	0	0	0	0	0	0	0	0	0	0	0	0	0	0	0	0	4.36395e-05	0	0	0	0	0	0	0	0	0.000218198	0	0	0.000218198	0	0	0	0.000174558	0	0	0	0	0	0	0	4.36395e-05	0	0
Clostridium_IV	0	0	0	0.000829151	0.00135283	0	0	0	0.000174558	0	0	0	0.000305477	0.000436395	0	0.000305477	0.00218198	0.000480035	0.00174558	0	8.72791e-05	0.000392756	0.000130919	8.72791e-05	0.000130919	0.000130919	0	0.00907702	8.72791e-05	0	0	0	0	0	0	0	0	0	0	0	0	0	0	0	0	8.72791e-05	8.72791e-05	4.36395e-05	0
Clostridium_XI	0	0	0	0.00100371	0.00091643	0.000349116	8.72791e-05	0	0.000567314	4.36395e-05	0	0	0.000567314	0.00196378	0	0.000698233	0.00117827	0.00222562	0.00370936	4.36395e-05	0.000261837	0.000654593	0.000130919	8.72791e-05	0.000261837	0.000130919	4.36395e-05	0.00968798	0.000174558	0	0	0	0	0	0	0	0	4.36395e-05	0	0	0	0	0	0	0	0.000523674	0.00161466	0.000698233	4.36395e-05
Clostridium_XVIII	0.00523674	0	8.72791e-05	0.00152738	0.0039712	0.000829151	4.36395e-05	0	0.00261837	0	0	4.36395e-05	0.00148374	0.00174558	0.000436395	0.00240017	0.0110408	0.00693869	4.36395e-05	0	0	4.36395e-05	0	0	0	0	0	4.36395e-05	4.36395e-05	0	0	0	0	0	0	0	0	0	0.000218198	0	0	0	0	0	0	0.00292385	0.00135283	0.00951342	0.000130919
Clostridium_XlVa	0.0137901	4.36395e-05	0.000130919	0.00610954	0.00305477	0.00213834	8.72791e-05	0	0.00401484	0.000218198	0	0.000130919	0.00218198	0.0058477	0.000610954	0.0054113	0.0243509	0.0199869	0.00453851	0.000174558	0.000349116	0.00109099	8.72791e-05	0.000174558	0.000218198	0.000261837	4.36395e-05	0.0138337	0.00357844	0	0	0	0	0	0	0	0	0	0	0	0	0	0	0	0	0.00170194	0.00488763	0.00501855	0.000392756
Clostridium_XlVb	0.00200742	0	0	0.000305477	0.000480035	0.000174558	0	0	0	0	0	0	4.36395e-05	0.000305477	0	0.000261837	0.0020947	0.00248745	0.000218198	0	0	0	0	4.36395e-05	0	0	0	0.0014401	8.72791e-05	0	0	0	0	0	0	0	0	0	0	0	0	0	0.000174558	0	0	0	0.000436395	0.000218198	0
Clostridium_sensu_stricto	0.000829151	0.00139647	0	0.000785512	0.000218198	0.000349116	0.289025	0.000610954	0.000349116	0.00126555	0.000174558	0.000392756	0.00091643	0.00152738	0.39712	0.104255	0.00602226	0.00183286	0.00785512	0.00117827	0.00785512	0.0116081	0.000829151	0.000567314	0.00296749	0.00235654	0.548156	0.0220816	0.00130919	0.000436395	0.000130919	0.00109099	0.126773	0.000698233	0.00178922	4.36395e-05	8.72791e-05	0.000567314	0.043945	0.000305477	4.36395e-05	0.000872791	0.000436395	0.000349116	0.0313332	0.000741872	0.000480035	0.000829151	0.00139647
Collinsella	0.000130919	0	4.36395e-05	0.000610954	0.000567314	0.000610954	0	0	0.000349116	0	0	0	0.00126555	0.00148374	4.36395e-05	0.00178922	0.00384028	0.00240017	0	0	0	0	0	0	0	0	0	4.36395e-05	4.36395e-05	0	0	0	0	0	0	0	0	0	0	0	0	0	0	0	0	0	0.000436395	0.00318569	0.000174558
Comamonas	0.0020947	0	4.36395e-05	0.000218198	4.36395e-05	8.72791e-05	0	0	0.00894611	0	0	0.000130919	0.000261837	8.72791e-05	8.72791e-05	0.00113463	0.000218198	0.0120445	8.72791e-05	0	0.000130919	0	0	0	0	0	0	0	0	0	0	4.36395e-05	0	0	0.000218198	0	0	8.72791e-05	0.000130919	0.000305477	4.36395e-05	0	4.36395e-05	4.36395e-05	0	0.00113463	0.0130482	0.0209033	0
Coprobacillus	0	0	0	0	0	0	0	0	0	0	0	0	0	0	0	0	0	0	0	0	0	0	0	0	0	0	0	0	0	0	0	0	0	0	0	0	0	0	0	0	0	0	0	0	0	0	0	0	0
Coprococcus	0	0	0	0.000349116	0	0	0	0	0	0	0	0	0	4.36395e-05	0	0.000130919	0.000392756	0.000349116	0	0	0	0	0	0	0	0	0	0	0	0	0	0	0	0	0	0	0	0	0	0	0	0	0	0	0	0	0	0	0
Corynebacterium	0.000698233	0	4.36395e-05	0.000174558	0.000480035	0	4.36395e-05	0	0.00178922	0	0	0	0.00113463	0	0.000218198	0.000130919	8.72791e-05	0.00126555	4.36395e-05	4.36395e-05	4.36395e-05	0.000480035	4.36395e-05	0	0	0	0	0.000174558	4.36395e-05	0	0	4.36395e-05	0	0.000130919	4.36395e-05	0	0	0	0.000349116	4.36395e-05	0	0	0	0	0	0.00192014	0.000567314	0.00152738	8.72791e-05
Craurococcus	0	0	0	0	0	0	0	0	0	0	0	0	0	0	0	0	0	0	0	4.36395e-05	0	0	0	0	0	0	0	0	0	0.000218198	0	0	0	0	0	0	0	0	0.000218198	0	0	0	4.36395e-05	0	0	0	0	0	0
Cupriavidus	0	0	0	0	0	0	0	0	0.000436395	0	0	0	4.36395e-05	0	0.000174558	0	0.000130919	4.36395e-05	0	0	0	0	0	0	0	0	0	0	0	0	0	0	0	0	0	0	0	0	0	0	0	0	0	0	0	0.000261837	0.000436395	0.000523674	4.36395e-05
Deinococcus	0	0	0	0	0	0	0	0	0	0	0	0	0	0	0	0	0	0	0	0	0	0	0	0	0	0	0	0.000174558	0	0	0	0	0	0	0	0	0	0	0	0	0	0	0	0	0	0	0	0	0
Derxia	0	0	0	0	0	0	0.00109099	0	0	0	0	0	0	0	0	0	0	0	0.000130919	8.72791e-05	0	0	0	0.000305477	0	0	0	0.000218198	0	0.000218198	0	0.000785512	0	0.00126555	0.00266201	0	0	0.000436395	0.000392756	0.000523674	0.000218198	0.000523674	0.00698233	4.36395e-05	0	0	0	0	0
Desulfobulbus	0	0	0	0	0	0	0	0	0	0	0	0	0	0	0	0	0	0	0	0	0	0	0	0	0	0	0	0	0	0	0	0	0	0	4.36395e-05	0	0	0	0	0	8.72791e-05	0.000218198	0	0	0	0	0	0	0
Desulfomicrobium	0	0	0	0	0	0	0	0	4.36395e-05	0	0	0	0	0	0	0	0	0	0.000261837	0	0	0	0	0	0	0	0	0	0	0	0	0	0	0	0	0	0	0	0	0	0	0	0	0	0	0	0	0	0
Desulfovibrio	0	0	0	0	0	0	0	0	0	0	0	0	0	0	0	0	0	0	0	0	0	0	0	0	0	0	0	0	0	0	0	4.36395e-05	0.0133537	0	0.000349116	0	0	0	0.000305477	4.36395e-05	0	0	0	0	0	0	0	0	0
Dialister	0.00493127	0	8.72791e-05	8.72791e-05	0.000654593	8.72791e-05	0.00130919	4.36395e-05	0.00139647	4.36395e-05	0	4.36395e-05	0.000349116	0.00091643	0.000305477	0.000436395	0.000480035	0.00122191	0.00244381	8.72791e-05	4.36395e-05	0	0	4.36395e-05	0.000130919	0	4.36395e-05	0.00126555	0.000174558	0	0	8.72791e-05	0.000174558	0	0.000610954	0	0	0	0.000741872	0.000305477	8.72791e-05	0.000130919	4.36395e-05	0	0.0110844	0	0.00096007	0	0.000218198
Dietzia	0	0	0	0	0	0	0	0	0	0	0	0	0	0	0	0	0.000349116	0	0	0	0	0	0	0	0	0	0	0	0	0	0	0	0	0	0	0	0	0	0	0	0	0	0	0	0	0	0	0	0
Dorea	0.00126555	0	0	0.000480035	0.000392756	0.000174558	0	0	4.36395e-05	0	0	0	0.000261837	0.000130919	0	0.000392756	0.00174558	0.000480035	0.000174558	0	0	0	0	0	0	0	0	0.00104735	4.36395e-05	0	0	0	0	0	0	0	0	0	0	0	0	0	0	0	0	8.72791e-05	0.000218198	0.000130919	4.36395e-05
Dyadobacter	0	0	0	0	0	0	0	0	4.36395e-05	0	0	0	0	0	0	0	0	0	0	0	0	0	0	0	0	0	0	0	0	0	0	0	0	0	0	0	0	0	0	0	0	0	0	0	0	0	8.72791e-05	0	0
Edwardsiella	0	0	0	0	0	0	0	0	0	0	0	0	0	0	0	0	0	0	0.000610954	0	0	0.000174558	0	0	0	0	4.36395e-05	0.000610954	4.36395e-05	0	0	0	0	0	0	0	0	0	0	0	0	0	0	0	0	0	0	0	0
Eggerthella	0	0	0	0	0.000218198	0	0	0	0.000305477	0	0	0	0.000130919	0	0	0.000174558	0.000523674	0	0	0	4.36395e-05	0	0	4.36395e-05	0	0	0	0.000174558	8.72791e-05	0	0	0	0	0	0	0	0	0	0	0	0	0	0	0	0	0	4.36395e-05	0	0
Eikenella	0	0	0	0	0	0	0.000392756	0	0	0	0	0	0	0	0	0	4.36395e-05	0	0	0	4.36395e-05	4.36395e-05	0	0.000698233	0	0	0	4.36395e-05	0	0	0	0.000174558	0	4.36395e-05	0.000305477	0	0	8.72791e-05	0.000305477	4.36395e-05	4.36395e-05	0	0	0	0	0	0	0	0
Empedobacter	0.000218198	0	0	0	0	4.36395e-05	0	0	4.36395e-05	0	0	0	0	0	0	0	0	8.72791e-05	0	0	0	0	0	0	0	0	0	0	0	0	0	0	0	0	0	0	0	0	0	0	0	0	0	0	0	0	0	4.36395e-05	0
Enhydrobacter	0.000218198	0	0	0.000130919	0	0	0	0	0.000349116	0	0	0	0	0	0	0	0	8.72791e-05	4.36395e-05	0	0	0	0	0	0	0	0	0	0	0	0	0	0	4.36395e-05	4.36395e-05	0	0	8.72791e-05	0	4.36395e-05	4.36395e-05	0	0	0	0	4.36395e-05	0	0.00109099	0
Enterococcus	0.00270565	0.211957	0.00309841	0.000610954	0.00100371	0.714641	0.144578	0.000785512	0.000567314	0.0344316	0.042374	0.0697796	0.519616	0.00558586	0.00711324	0.0263583	0.0058477	0.0039712	0.00200742	0.000567314	0.00130919	0.000829151	0.000349116	0.00104735	0.00139647	0.228191	0.0051931	0.0033166	0.000130919	0.00130919	0.00802967	8.72791e-05	0.003753	0.00554222	0.0135719	0.248789	0.0072878	0.0451669	0.00903338	0.00174558	0.0205106	0.00432031	0.00244381	0.179053	0.00423304	0.00890247	0.00558586	0.00366572	0.356099
Erysipelotrichaceae_incertae_sedis	0.00139647	0	0	0.000305477	0.000480035	4.36395e-05	4.36395e-05	0	8.72791e-05	0	0	0.000130919	0.000174558	0.000741872	0.000174558	0.000480035	0.00266201	0.000829151	4.36395e-05	4.36395e-05	0	0	0	0	0	0	0	0.000436395	0	0	0	0	0	0	0	0	0	0	0	0	0	0	0	0	0	0	0.000130919	0	4.36395e-05
Erythrobacter	0.000261837	0	0	4.36395e-05	0	0	0	0	0.000436395	0	0	0	0	4.36395e-05	8.72791e-05	0	4.36395e-05	0.000829151	0	0	0	0	0	0	0	0	0	0	0	0	0	0	0	0	0	0	0	0	0	0	0	0	0	0	0	0	4.36395e-05	0.00096007	0
Escherichia/Shigella	0.0160593	0.0072878	0.973904	0.781279	0.0153611	0.0110844	0.0276675	0.97722	0.0227362	0.00925158	0.00370936	0.849356	0.0072878	0.0122627	0.0932141	0.167358	0.0459961	0.0567314	0.0169321	0.418547	0.0167139	0.0552477	0.00222562	0.00449487	0.0054113	0.00501855	0.266332	0.0821732	0.00362208	0.0108226	0.0518001	0.0093825	0.56487	0.0107353	0.00676413	0.716081	0.0473489	0.00183286	0.144796	0.182195	0.871307	0.040672	0.0056295	0.00392756	0.178922	0.122365	0.0355662	0.0414139	0.0378355
Eubacterium	0	0	4.36395e-05	0.000567314	8.72791e-05	0	0.0020947	0	0.00205106	0	0	0	0	0	4.36395e-05	0.000130919	0.00117827	4.36395e-05	0.00453851	0.000785512	0.000654593	0.000130919	0.000174558	0.0155793	0.000218198	4.36395e-05	4.36395e-05	0.00152738	0.00658957	0.000436395	4.36395e-05	0.00161466	4.36395e-05	0.000436395	0.00283657	0	0	0.00746236	0.0014401	0.00122191	0.000392756	0.000523674	0.00318569	8.72791e-05	8.72791e-05	0	0.00135283	0	8.72791e-05
Faecalibacterium	0.0452106	4.36395e-05	0.000305477	0.0427667	0.0143138	0.00920794	0.000218198	0	0.0261837	0.000174558	4.36395e-05	0.000610954	0.0204669	0.0392756	0.00240017	0.039712	0.114772	0.0947414	0.000261837	0.000261837	0.000130919	0.000130919	0	0	0	0.000261837	0.000174558	0.000436395	0.00117827	0	0	0	0	0	0	0	0	0	0.000305477	0	0	0.000392756	0	0	0	0.0203797	0.0284966	0.0452106	0.00218198
Filifactor	0	0	0	0	0	0	0.00340388	4.36395e-05	0.0033166	0	0	0	0	0	0	0.000218198	0.000305477	0	0.00222562	8.72791e-05	0.0121754	4.36395e-05	0	0.000829151	4.36395e-05	0	4.36395e-05	0	0	0	0	0.000305477	4.36395e-05	0.000130919	0.000392756	0	0	8.72791e-05	0.000698233	0	4.36395e-05	0	4.36395e-05	8.72791e-05	4.36395e-05	0	0	0	0.000174558
Finegoldia	0	0	0	0.000174558	4.36395e-05	0	0	0	0.000654593	0.000130919	4.36395e-05	0	0.000218198	0	4.36395e-05	0	0.000174558	0	0.000698233	4.36395e-05	0	0	0	0	0	0	0	0	0	0	0.000654593	0	0	0.00309841	0	0	0	0.000174558	0.000480035	8.72791e-05	0.000261837	0.000130919	0	4.36395e-05	0.0172376	4.36395e-05	0.000654593	0	0.000261837
Flavonifractor	0.00480035	0	4.36395e-05	0.000523674	0.00091643	4.36395e-05	0	0	0.000654593	0	0	4.36395e-05	0.000610954	0.00135283	0	0.000698233	0.0023129	0.0023129	0.00296749	4.36395e-05	4.36395e-05	4.36395e-05	0.000218198	0.000130919	8.72791e-05	0.000349116	0	0.0120009	8.72791e-05	0	0	0	0	0	0	0	0	0	0	0	0	0	0	0	0	0.000305477	0.00126555	0.000523674	4.36395e-05
Fusobacterium	0.00253109	0.000610954	0.000174558	0	0.000174558	0	0.0446432	0.000436395	0.0583024	0.00091643	0.000218198	0.000218198	0	0	0.000480035	0.000654593	0.00109099	0.000654593	0.0205106	0.0114772	0.000392756	0.0033166	0.00135283	0.0570805	0.00226926	0.000349116	0.00091643	0.00925158	0.00641501	0.00178922	0.0126118	0.011259	0.00680777	0.00349116	0.0250927	0.000174558	0.0122191	0.0167139	0.0190268	0.0108662	0.00322933	0.00545494	0.0023129	0.000829151	0.357233	4.36395e-05	0.00501855	0.00091643	0.00693869
Gemella	0.00392756	0	0	8.72791e-05	8.72791e-05	0	0.00466943	4.36395e-05	0.00680777	8.72791e-05	0	4.36395e-05	0.000523674	0.000305477	0.0267947	0.000610954	0.000218198	0.000829151	4.36395e-05	0.00196378	4.36395e-05	0	0.000261837	0.00139647	0.000174558	4.36395e-05	0	0.000218198	0.0091643	0	0	0.00122191	0.00113463	0.017674	0.00288021	0.000130919	8.72791e-05	0.00113463	0.00096007	0.00126555	0.000218198	0.00122191	0.000785512	4.36395e-05	0	4.36395e-05	0.0016583	8.72791e-05	0.00096007
Gemmatimonas	0	0	0	0	0	0	0	0	0	0	0	0	0	0	0	0	0	0	0	0	0	0	0	0	0	0	0	0	0	0	0	0	0	0	0	0	0	0	0	0	0	0	0	0	0	0	0	0	0
Gemmiger	0.0056295	0	0	0.000130919	0.00091643	8.72791e-05	0	0	0.000698233	0	0	0	0.00091643	0.000654593	0.000130919	0.00130919	0.00135283	0.00314205	0	0.000392756	0	0	0	0	0	0	0	0	4.36395e-05	0	0	0	0	0	0	0	0	0	0	0	0	0	0	0	0	0.000523674	0.00096007	0.00244381	0
Geobacillus	0.00410212	0	4.36395e-05	0.000523674	0.00117827	0.000654593	0	0	0.0106917	4.36395e-05	0	0.000174558	0.000741872	0.00235654	0.00178922	0.000872791	0.0035348	0.010648	0	0	0	0	0	0	0	0	0	0	4.36395e-05	0	0	0	0	0	0	0	0	0	0	0	0	8.72791e-05	0	0	4.36395e-05	0.0018765	0.00672049	0.0100807	0.000392756
Gp1	0	0	0	0	0.000654593	0	0	0	0	0	0	0	0	0	0	0	0	0	0	0	0	0	0	0	0	0	0	0	0	0	0	0	0	0	0	0	0	0	0	0	0	0	0	0	0	0	0	0	0
Gp2	0	0	0	0	0	0	0	0	0	0	0	0	0	0	0	0	0	0	0	0	0	0	0	0	0	0	0	0	0	0	0	0	0	0	0	0	0	0	0	0	0	0	0	0	0	0	0.000698233	0	0
Gp4	0.00471307	0	0	0.000174558	0.000349116	0	0	0	0	0	0	0	0	0	0	0	0	0.0014401	0	0	0	0	0	0	0	0	0	0	0	0	0	0	0	0	0	0	0	0	4.36395e-05	0	0	0	0	0	0	0	0	0	0
Granulicatella	0.00113463	0	0	0.000218198	0.00759328	0.000480035	0.00907702	0	0.0315077	0	0.000130919	0.000174558	0.00244381	0.0254419	0.0423304	0.000829151	0.00178922	0.000654593	0.0338206	0.00458215	0.0144447	0.000130919	0.000436395	0.0164085	0.000872791	8.72791e-05	4.36395e-05	0.000261837	0.0771111	0.00174558	0.000218198	0.00235654	0.000436395	0.0255728	0.019856	0.000218198	0.000174558	0.0677722	0.00946978	0.0506655	0.0014401	0.00327297	0.0971416	0.000785512	0	0.000829151	0.0954833	0.00213834	0.00283657
Haemophilus	0.00292385	0.000130919	8.72791e-05	0.000218198	0.0014401	0.000610954	0.0266201	8.72791e-05	0.108793	8.72791e-05	4.36395e-05	0.000174558	0.00130919	0.00270565	0.01187	0.00253109	0.00763692	0.00445123	0.000392756	0.0204669	0.0429413	0.000654593	0.00240017	0.158281	0.00235654	0.000567314	0.00139647	0.00148374	0.000218198	0.00257473	0.000174558	0.0200305	0.00327297	0.0377482	0.0489636	0.000610954	0.000349116	0.0113026	0.0180668	0.018154	0.00392756	0.00702597	0.0808641	0.00741872	0.0174558	8.72791e-05	0.00130919	0.000654593	0.0020947
Hafnia	0	0	0	0.000305477	4.36395e-05	0	0	0	0	0	0	0.000654593	0	4.36395e-05	0.000130919	0.0181104	0.00157102	0.000218198	0.000174558	8.72791e-05	4.36395e-05	0	0	8.72791e-05	0	8.72791e-05	4.36395e-05	0.000349116	0	0	0	0	0.000436395	0	0	0	0	0	0.000261837	0	0	0.000130919	4.36395e-05	0	0.000218198	0	0	0	0.000130919
Hallella	0	0	0	0	0	0	0	0	0	0	0	0	0	0	0	0	0	0	0.000349116	0	0	0	0	0	0	0	0	0	0	0	0	0	0	0	0	0	0	0	0	0	0	0	0	0	0	0	0	0	0
Halomonas	0	0	0	0	0	0	0	0.000130919	0	0	0	0	0	0	0	0	0	0	0.383373	0.24329	0.119223	0.84041	0.363168	0.0545494	0.0912066	0.0293694	0.00370936	0.287279	0.106262	0.346891	0.00685141	0.702029	0.0114336	0.398429	0.362645	0.0167576	0.0177177	0.156884	0.235173	0.279293	0.0336897	0.700895	0.195549	0.0147938	0	0	0	0	0
Helicobacter	0	0	0	0.000261837	0	4.36395e-05	0	0	4.36395e-05	0	0	0	0.00100371	0.00122191	0	0.00109099	0.00200742	0.000654593	0.00096007	0	4.36395e-05	0.000305477	0	0.000130919	0.000218198	8.72791e-05	0	0.00462579	0	0	0	0	0	0.000654593	0.000523674	0	0	0	0.00161466	4.36395e-05	0	0	4.36395e-05	0.000305477	0	0	8.72791e-05	0.000174558	0
Holdemania	0.00091643	0	0	8.72791e-05	0	0	0	0	0	0	0	0	0	0.000130919	0	0	0.000261837	0.00183286	0	0	0	0	0	0	0	0	0	0	0	0	0	0	0	0	0	0	0	0	0	0	0	0	0	0	0	0	0.000872791	0	0
Hydrogenophaga	0	0	0	0	0	0	0	0	0	0	0	0	0	0	0	0	0	0	0	0	0	0.000130919	0	0	0	0	0	0	0	0	0	0	0	0	0	0	0	0	0	0	0	0	0	0	0	0	0	0	0
Hydrogenophilus	0	0	0	4.36395e-05	0	0	0	0	0	0	0	0	8.72791e-05	0	0	0	0	8.72791e-05	0	0	0	0	0	0	0	0	0	0	0	4.36395e-05	0	0	0	0	0	0	0	0	8.72791e-05	0	0	0	0	0	0	0	0.000218198	0	0
Johnsonella	0	0	0	0	0	0	0.000130919	0	0	0	0	0	0	0	0	0	0	0	8.72791e-05	0	0.00453851	0	0	4.36395e-05	0	0	0	0	4.36395e-05	0	0	0	4.36395e-05	0	0	8.72791e-05	0	0	0	4.36395e-05	0	0	0.000436395	0	0	0	0	0	0
Kingella	0	0	0	0	0	0	0	0	0	0	0	0	0	0	0	0	0	0	4.36395e-05	0	0	0	0	0	0	0	0	0	8.72791e-05	0.000130919	0	0	0	0	4.36395e-05	0	0	0	0	4.36395e-05	0	0	4.36395e-05	0	0	0	0	0	0
Klebsiella	0.0291949	0.580275	0.0108662	0.0072878	0.00554222	0.110408	0.111368	0.0109099	0.0163212	0.606982	0.569976	0.060528	0.00724416	0.00685141	0.059437	0.299105	0.0446869	0.0301986	0.00811695	0.00139647	0.504037	0.00257473	0.000436395	0.00449487	0.00196378	0.577177	0.00240017	0.007506	0.000174558	0.367009	0.0182413	0.00244381	0.0253546	0.00667685	0.00122191	0.000218198	0.019245	0.000261837	0.00558586	0.000654593	0.000261837	0.00672049	0.0191141	0.000261837	0.0292385	0.650229	0.0439014	0.0508401	0.13441
Lachnoanaerobaculum	8.72791e-05	0	0	8.72791e-05	4.36395e-05	0	0.00379664	0	0.00279293	0	0	0	0	0	0	0	0	0.000305477	0.00148374	0.00170194	0	0	0	0.00759328	4.36395e-05	8.72791e-05	4.36395e-05	0.00117827	0.00602226	0	0	0	0	0.000261837	0.000785512	4.36395e-05	0	0.00706961	0.000829151	0.000130919	0.00178922	0.000174558	0.000480035	0.000130919	0	0	0.00222562	0	4.36395e-05
Lachnospiracea_incertae_sedis	0.0260092	0	8.72791e-05	0.0130482	0.066463	0.00466943	0	4.36395e-05	0.00973162	8.72791e-05	0	0.000480035	0.0060659	0.010648	0.00100371	0.0104735	0.0347371	0.0366572	0.0014401	0.000174558	0.000349116	0.000261837	0.000130919	8.72791e-05	0.000130919	0.000480035	0	0.00436395	0.000785512	0	0	0	0	0	0	0	0	0	0	0	0	4.36395e-05	0	0	4.36395e-05	0.00248745	0.00624045	0.016583	0.0133537
Lactobacillus	0	0	0	0.00196378	0.00126555	0.000349116	4.36395e-05	0	0.000829151	0	0	0	0.000218198	0.0023129	0.000261837	0.000654593	0.00174558	0.00091643	0.00401484	0.000261837	0.000349116	0.000174558	0.000392756	0.000218198	0.000523674	8.72791e-05	4.36395e-05	0.00994981	0.000349116	0	0	0	8.72791e-05	0	0	0	0	0.000218198	0	0.00235654	0	0	0	0	0.00122191	0.000480035	0.000305477	0.000654593	0.000349116
Lactococcus	0	0	0	0	0	0	0	0	0	0	0	0	0	0	0	0	0	0	0.000174558	0	0	4.36395e-05	0	0	0	0	0	0.00091643	0	0	0	0	0	0	0	0	0	4.36395e-05	0	0	0	0	0	0	0	0.00802967	8.72791e-05	0	0
Latescibacteria_genera_incertae_sedis	0	0	0	0	0	0	0	0	0	0	0	0	0	0	0	0	0	0	0	0	0	0	0	0	0	0	0	0	0	0	0	0	0	0	0	0	0	0	0	0	0	0	0	0	0	0	4.36395e-05	0	0
Leptotrichia	0.000130919	0	4.36395e-05	8.72791e-05	0	0	0.00484399	0	0.0133973	0	0	0	0.000218198	0	0.00401484	4.36395e-05	0.000392756	0.000392756	0.0060659	0.00362208	0	0	0.000174558	0.00484399	0.000392756	0.000130919	0	0.0014401	0.000785512	0.000480035	0	0.00222562	8.72791e-05	0.000654593	0.00619681	4.36395e-05	0	0.00322933	0.00379664	0.00213834	0.000567314	0.00104735	0.0072878	0.000349116	0.00157102	8.72791e-05	0.0198996	0	0.000523674
Longilinea	0	0	0	4.36395e-05	4.36395e-05	0	8.72791e-05	0	0.000174558	0	0	0	0	0	0	0	0	0	0	0	0	0	0	0	0	0	0	0	0	0	0	0	0	0	0	0	0	0	0	0	0	0	0	0	0	0	0	0	0
Lysobacter	0	0	0	0	0	0	0	0	0	0	0	0	4.36395e-05	0	0	4.36395e-05	8.72791e-05	0.000523674	0	0	0	0	0	0	0	0	0	4.36395e-05	0	0	0	0	0	0	0	0	0	0	0	0	0	0	0	0	0	0.000480035	4.36395e-05	0	0
Marvinbryantia	0	0	0	0	0	0	0	0	0.000174558	0	0	0	0	0.000174558	0	0	0.000261837	0	0.000305477	0	0	0	0	0	0	0	0	0.000349116	0	0	0	0	0	0	0	0	0	0	0	0	0	0	0	0	0	0	0.000130919	0	0
Massilia	0.00266201	0	0	0.000174558	0.00152738	4.36395e-05	0	0	0.000305477	0	0	0	0	8.72791e-05	4.36395e-05	4.36395e-05	0	0.000829151	0.000174558	0	8.72791e-05	0	4.36395e-05	0	4.36395e-05	0	0	0.000130919	4.36395e-05	0	0	0	0	0.000218198	0.000392756	0	0	0.000174558	0	0.000130919	0	8.72791e-05	8.72791e-05	0	0	0.000305477	0.000261837	0.00135283	0
Megamonas	4.36395e-05	0	4.36395e-05	0.000523674	4.36395e-05	0.00122191	0	0	0.000829151	4.36395e-05	0	4.36395e-05	0.00192014	0.00445123	4.36395e-05	0.00405848	0.0190705	0.0111281	0	0	0	0	0	0	0	0	0	0	4.36395e-05	0	0	0	0	0	0	0	0	0	0	0	0	0	0	0	0	0.00126555	0.00148374	0.0016583	0.000130919
Megasphaera	8.72791e-05	0	0	0.000392756	0.000349116	0.00091643	0.000523674	0	0.0041894	0	0	8.72791e-05	0.00126555	0.00205106	0.000130919	0.00174558	0.00811695	0.00523674	8.72791e-05	0	0	0	8.72791e-05	0.0098189	0	0	0	0	0.00667685	0	0	0	0	0	0.000349116	8.72791e-05	0	0.00253109	0.000349116	0.000349116	4.36395e-05	0	0.000130919	4.36395e-05	0	0.000654593	0.000349116	0	0.000218198
Methylobacterium	0.000261837	0	4.36395e-05	4.36395e-05	0.00161466	8.72791e-05	0	0	0.00091643	0	0	4.36395e-05	0.00113463	0.000130919	0.000480035	0.000305477	0.000741872	0.00257473	0.000305477	8.72791e-05	8.72791e-05	0.00091643	0.000261837	0.000130919	0	0	0	0	8.72791e-05	0	4.36395e-05	4.36395e-05	0	0	0	0	0	4.36395e-05	0.000218198	0.000305477	0	4.36395e-05	8.72791e-05	0	0	0.000654593	0.000741872	0.00266201	4.36395e-05
Micrococcus	0	0	0	0	8.72791e-05	4.36395e-05	0	0	4.36395e-05	0	0	4.36395e-05	4.36395e-05	0	4.36395e-05	4.36395e-05	0.000349116	8.72791e-05	0	0	0.000174558	0	0	0	0	0	0	8.72791e-05	0	0	0	0	0	0	0	0	0	0	0	0	0	0	0	0	0	0	8.72791e-05	0	0
Mobiluncus	0	0	0	0	0	0	0	0	0	0	0	0	0	0	0	0	4.36395e-05	0	0	0	0	0	0	0.0023129	0	4.36395e-05	0	0	0.000392756	0	0	0	0	0	0	0	0	0.000130919	0	0	0	0	0	0	0	0	0.000130919	0	0
Mogibacterium	0	0	0	0	0	0	4.36395e-05	0	0	0	0	0	0	0	0	0	0	0	0	0	0.000261837	0	0	0.000436395	0	0	0	0	0.000436395	0	0	0	0	0	0.000392756	0	0	0.00196378	0	0	0	0	0	0	4.36395e-05	0	8.72791e-05	0	0
Morganella	0	0.000305477	0	0	0	4.36395e-05	0	8.72791e-05	0	0	0	0	0	0.000218198	0	0	8.72791e-05	0	0.00183286	0	4.36395e-05	0.000436395	0	4.36395e-05	4.36395e-05	0	0	0	4.36395e-05	0.0223871	0.893563	0.00702597	0.224613	0.00096007	0.00877155	0.00597862	0.882522	0.00344752	0.0172376	0.0163212	0.00536766	0.0552477	0.0425485	0.00811695	0.00933886	0	0	0	0.000218198
Moryella	8.72791e-05	0	0	4.36395e-05	0	0	0.00510583	0	0.00724416	0	0	0.000130919	0	0	0	0	0	0.00096007	8.72791e-05	0.000349116	4.36395e-05	0	0	0.00357844	0	0	0	0.000261837	0.00925158	4.36395e-05	0	0	0	0	0.000741872	0	4.36395e-05	0.00392756	0	0	8.72791e-05	0	0.00706961	0	0	0.000130919	0.00768056	0.000130919	4.36395e-05
Murdochiella	0	0	0	0	0	0	0	0	0	0	0	0	0	0	0	0	0	0.000130919	0	0	0	0	0	0	0	0	0	0	0	0	0	0	0	0	0	0	0	0	0	0	0	0	0	0	0	0	0	0.000174558	0
Mycoplasma	0	0	0	0	0	0	0	0	0	0	0	0	0	0	0	0	0	0	0	0	4.36395e-05	0	0	0	0	0	0	0	0	0	0	0.000305477	0	0	0.000349116	0	0	8.72791e-05	0	8.72791e-05	0	0	0	4.36395e-05	0	0	0	0	0
Neisseria	0.00192014	4.36395e-05	0.000218198	0.000130919	0.000174558	0.000130919	0.132359	0.000218198	0.0356099	0.000174558	8.72791e-05	8.72791e-05	0.000392756	0.000305477	0.000305477	0.000480035	0.00122191	0.00174558	0.00091643	0.0352171	0.000305477	0.00117827	0.00632773	0.0798167	0.00776784	0.000436395	0.000785512	0.00379664	0.00737508	0.00685141	0.000349116	0.0299804	0.000392756	0.0440759	0.0885446	0.00148374	0.000392756	0.0164085	0.0373554	0.0391883	0.00807331	0.0116954	0.0110844	0.00205106	0.000130919	0.000218198	0.0149684	0	0.00283657
Nesterenkonia	4.36395e-05	0	4.36395e-05	8.72791e-05	0	0.000261837	0	0	4.36395e-05	4.36395e-05	0	0	0.000349116	0.000610954	0	0.000392756	0.00135283	0.00100371	0.00327297	0.00152738	0.000480035	0.00427667	0.00226926	0.000523674	0.00104735	0.000392756	0	0.00148374	0.000610954	0.00401484	0	0.0077242	0	0.0103862	0.00318569	0.000130919	4.36395e-05	0.0020947	0.00283657	0.00148374	0.000261837	0.00401484	0.00370936	8.72791e-05	0	0	0.000305477	0	4.36395e-05
Niastella	0	0	0	0	0	0	0	0	0	0	0	0	0	0	0	0	0	0	0	0	0	0	0	0	0	0	0	0	0	0	0	0	0	0	0	0	0	0	0	0	0	0	0	0	0	0	0	0	0
Nitrospira	0	0	0	0	0	0	0	0	0	0	0	0	0	0	0	0	0	0	0	0	0	0	0	0	0	0	0	0	0	0	0	0	0	0	0	0	0	0	0	0	0	0	0	0	0	0	0	0	0
Nocardioides	0	0	0	0	0	0	0	0	0	0	0	0	0	0	0	0	0	0.000130919	0	0	0.000130919	0	0	0	0	0	0	0	0	0	0	0	0	0	0.026882	0	4.36395e-05	0.00589134	0	0	0	4.36395e-05	0	0	0	0	8.72791e-05	0	0
Novosphingobium	0	0	0	0.000130919	0.000218198	0	0	0	0.000130919	0	0	0	4.36395e-05	0	0	0	0	0.000174558	0	0	0	0	0	0	0	0	0	0	0	0	0	0	0	0	0	0	0	8.72791e-05	0	0	0	0	0	0	0	0.000480035	0.000305477	0.000261837	0
Odoribacter	0	0	0	0.000654593	4.36395e-05	0	0	0	0	0	0	0	0.000392756	0.000392756	0	0.000829151	0.00235654	0.000392756	0.000130919	0	0	8.72791e-05	0	4.36395e-05	0	0	0	0.000523674	0.000436395	0	0	0	0	0	0	0	0	0	0	0	0	0	0	0	0	0	0	0	8.72791e-05
Okibacterium	0.0312895	0	0.000130919	0.000305477	0.0016583	0.000480035	0.000174558	0	0.00501855	0	0	0	0.000829151	0.000392756	4.36395e-05	0.000130919	0.000872791	0.00715688	0.000130919	0	0	0	0	0	4.36395e-05	0	0	0	4.36395e-05	0	0	0	4.36395e-05	0	0	0	0	0	0	0	0	4.36395e-05	0	0	0	0.00148374	0.00536766	0.00148374	0.000872791
Olsenella	0	0	0	0	0	0	0	0	0	0	0	0	0	0	0	0	0	0	0.000654593	0	0.000218198	0	0	0	8.72791e-05	4.36395e-05	0	0.000698233	0	0	0	0	0	0	0	0	0	0	0	4.36395e-05	0	0	4.36395e-05	0	0	0	0	0	0
Opitutus	0	0	0	0	0	0	0	0	0	0	0	0	0	0	0	0	0	0	0	0	0	0	0	0	0	0	0	0	0	0	0	0	0	0	0	0	0	0	0	0	0	0	0	0	0	0	0	0	0
Oribacterium	0.00183286	0	0	0	0	0	0.0035348	0	0.00257473	0	0	8.72791e-05	0	0.000130919	0.000174558	4.36395e-05	8.72791e-05	0	0.00161466	0.000218198	0.000349116	0	4.36395e-05	0.0123936	4.36395e-05	8.72791e-05	4.36395e-05	0.000130919	0.0120009	0.000218198	0	0.00130919	0	0.000480035	0.00506219	4.36395e-05	8.72791e-05	0.0152738	0.00139647	0.00174558	0.000218198	0.000218198	0.0035348	4.36395e-05	4.36395e-05	0	0.0035348	8.72791e-05	0.000654593
Oscillibacter	0.00266201	0	0	0.000480035	0.00117827	4.36395e-05	4.36395e-05	0	0.000130919	0	0	8.72791e-05	0.000872791	0.00126555	0.000261837	0.000654593	0.00405848	0.00218198	0.00340388	8.72791e-05	0.000349116	0.000261837	8.72791e-05	0.000349116	0.000741872	8.72791e-05	0	0.0127427	0.000174558	0	0	0	0	0	0	0	0	0	4.36395e-05	0	0	0	0	0	0	4.36395e-05	0.000174558	0.000349116	0.000174558
Paludibacter	0	0	0	0	4.36395e-05	0	0	0	0	0	0	0	0	0	0	0	0	0	0.000218198	8.72791e-05	0	0	0	0	0	0	0	0.000174558	0	0	0	0	0	0	8.72791e-05	0	0	0.000261837	8.72791e-05	0.000261837	0	0	0	0	0	0	0	0	0
Parabacteroides	0.0138337	0	8.72791e-05	0.00244381	0.00222562	0.000785512	4.36395e-05	0	0.00157102	0	0	0	0.000785512	0.0020947	0.000130919	0.00261837	0.00781148	0.00885883	0.00130919	4.36395e-05	0.000218198	8.72791e-05	8.72791e-05	0	0.000174558	0.000130919	0	0.00305477	0.000872791	0	0	0	0	0	0	0	0	0	0	0	0	0	0	0	0	0	0.000305477	0.000610954	0.000130919
Paracoccus	0.000174558	0	0	0	0	0	0	0	0	0	0	0	0	8.72791e-05	0	0	0	0.00327297	4.36395e-05	0	0.000130919	0	0	0	0	0	0	0	0	8.72791e-05	0	0	0	0	0	0	0	0	0	0	0	4.36395e-05	0	0	0	0	0.000261837	0.000480035	0
Paraeggerthella	0	0	0	0	0	0	0	0	0	0	0	0	0.000130919	0	0	0	0	0	0.00248745	8.72791e-05	0	8.72791e-05	0	0	0	0	0	0	0	0	0	0	0	0	0	0	0	0	0	0	0	0	0	0	0	0	0	0	0
Paraprevotella	0	0	0	0	0	0	0	0	0	0	0	0	4.36395e-05	0	0	0	0.000567314	0.000349116	0	0	0	0	0	0	4.36395e-05	0	0	0.000698233	0	0	0	0	0	0	0	0	0	0	0	0	0	0	0	0	0	0	0	0	0
Parasutterella	0.00122191	0	0	0.000480035	0.00309841	0.000436395	0	0	0.000698233	0	0	4.36395e-05	0.000305477	0.000610954	0	0.000480035	0.00301113	0.00174558	0.00157102	0	0	0	4.36395e-05	4.36395e-05	0.000174558	0.000130919	4.36395e-05	0.00523674	0.00091643	4.36395e-05	0	0	0	0	0	0	0	0	0	0	0	0	0	0	0	0	0	0.000261837	0.000130919
Parvimonas	0.00109099	0	0	0	0	0	0.00196378	4.36395e-05	0.000829151	0	0	0	0	4.36395e-05	0.000349116	0.000654593	0.000480035	0.000130919	0.00458215	0.00200742	0.000829151	0	0.000305477	0.00222562	0.000741872	0	8.72791e-05	0.000349116	0.000174558	0	0	0	0.000261837	0	0.000523674	0	0	0.0079424	8.72791e-05	4.36395e-05	4.36395e-05	8.72791e-05	0	0	0	0	0.000610954	0	0.000218198
Pedobacter	0	0	0	0	0	0	0	0	0	0	0	0	0	0	0	0	0	0	0	0	0	0.000392756	4.36395e-05	0	0	0	0	0	0	0	0	0	0	0	0	0	0	0	0	0	0	0	0	0	0	0	0.000130919	0	0
Pelagibacterium	0	0	0	0	0	0	0	0	0	0	0	0	0	0	0	0	0	0	0.0166267	0.0169758	0.00379664	0.0384464	0.0181104	0.00314205	0.00864063	0.00261837	0.000305477	0.00942614	0.00528038	0.0224744	0.000436395	0.0590879	0.000785512	0.0482653	0.027842	0.00148374	0.000436395	0.0115208	0.00977526	0.00920794	0.00152738	0.0601789	0.0147502	0.000392756	0	0	0	0	0
Pelomonas	0	0	0	4.36395e-05	0.000305477	0	0	0	0.000872791	0	0	4.36395e-05	0	8.72791e-05	0	0	0	0.00117827	0	0	0	0	0	0	0	0	0	0	0	0	0	0.000480035	0	0	4.36395e-05	0	0	8.72791e-05	0.000130919	0	0	4.36395e-05	0	0	0	0	0.000349116	0.00157102	0
Peptococcus	0	0	0	0	0	0	0.000436395	0	0.000174558	0	0	0	0	0	0	0	0	0	0	8.72791e-05	4.36395e-05	0	0	0	8.72791e-05	0	0	0	0	0	0	0	0	0	0	0	0	8.72791e-05	0	0	0	0	0	0	4.36395e-05	0	0	0	0.000261837
Peptoniphilus	0	0	0	0	0	0	0	0	8.72791e-05	0	0	0	0	0	0.000174558	0	0	0	0	0	0	0	0	0	0	0	0	0	0	0	0	0	0	0	0	0	0	0	0	0	0	0	0	0	0	0	8.72791e-05	8.72791e-05	0
Peptostreptococcaceae_incertae_sedis	0	0	0	0	0	0	0.00205106	0	0	0	4.36395e-05	0	0	0	0	0	0	0	0	8.72791e-05	0	0	0	0	0	0	0	0	0	8.72791e-05	0	0	0	0	0	0	0	0	0	0	0	0	0	0	4.36395e-05	0	0	0	0
Peptostreptococcus	0.00122191	0	0	0	0	0	0.00855335	0	0.00183286	0	0	8.72791e-05	0	8.72791e-05	0	0.000523674	0	0	0.000829151	0.0018765	8.72791e-05	4.36395e-05	0.000174558	0.0230853	0.000174558	0.000349116	0	0.000261837	0.0039712	0.000305477	0	0	0	0.00130919	0.00161466	4.36395e-05	0	0.00654593	0.000436395	0.000261837	0.000261837	0.000174558	0.00410212	0	0	0.000130919	0.00493127	0	0.00122191
Phascolarctobacterium	0.00266201	0	0	0.000436395	0.000349116	0	0	0	0.00174558	0	0	0	0.000261837	0.000436395	0	0.000392756	0.000872791	0.00100371	0.000305477	0	4.36395e-05	0	0	4.36395e-05	8.72791e-05	4.36395e-05	0	0.000698233	8.72791e-05	0	0	0	0	0	0	0	0	0	0	0	0	0	0	0	0	0.000130919	0.000392756	0.000349116	0
Phocaeicola	0	0	0	0	0	0	0	0	0	0	0	0	0	4.36395e-05	0	0	0	0	0	0	0.00898974	4.36395e-05	0	4.36395e-05	0	0	0	0	0	0	0	0	0	0	8.72791e-05	0	0	0	4.36395e-05	8.72791e-05	4.36395e-05	0	8.72791e-05	0	0	0	0	0	0
Pontibacter	0	0	0	0	0	0	0	0	0	0	0	0	0	0	0	0	0	0	0	0	0	0	0	0	0	0	0	0	0	0	0	0	0	0	0	0	0	0	0	0	0	0	0	0	0	0	0	0	0
Porphyrobacter	0	0	0	0	0	0	0	0	0	0	0	0	0	0	0	0	0	0	0	0	0	0	0	0	0	0	0	0	0	0	0	0	0	0	0	0	0	0	0	0	0	0	0	0	0	0	0	0.000741872	0
Porphyromonas	0	0	0	0.000174558	0	0	0.00859699	0	0.00091643	0	4.36395e-05	0	0	8.72791e-05	0.000261837	0	0.000523674	0.000218198	0.00174558	0.00327297	8.72791e-05	0	0.000480035	0.00309841	0.00091643	0	0.000261837	0.00139647	0.000654593	0.00218198	4.36395e-05	0.00951342	8.72791e-05	0.00392756	0.027842	0.000218198	4.36395e-05	0.0051931	0.0132228	0.011259	0.00218198	0.00366572	0.000829151	0.000305477	0	0.000174558	0.0156666	0	8.72791e-05
Prevotella	0.00183286	0	8.72791e-05	0.00274929	0.00837879	0.0023129	0.0218198	0	0.0235217	0	4.36395e-05	0.000261837	0.0091643	0.00737508	0.0132664	0.00554222	0.0206851	0.0182413	0.00366572	0.00811695	0.00480035	0.000480035	0.00183286	0.195592	0.00161466	0.000829151	0.000698233	0.00362208	0.0879773	0.00864063	8.72791e-05	0.0320314	8.72791e-05	0.0559895	0.0769365	0.00117827	0.000130919	0.0246127	0.0522802	0.0576042	0.0124373	0.0111281	0.0058477	0.00104735	0	0.00205106	0.0166267	0.00344752	0.00135283
Propionibacterium	0.000261837	0	0	0	0.000174558	0	0	0	0.000523674	0	0	0	0	4.36395e-05	0	0	0.000130919	4.36395e-05	4.36395e-05	0	0	0	0	0	0	0	0	0.000130919	0	0	0	0	0	0	0	4.36395e-05	0	0	4.36395e-05	0.000261837	0	0	0	0	0	8.72791e-05	0.000436395	0	0
Propionicicella	0.000261837	0	0	0	0	0	0	0	0	0	0	0	0	0	0	0	0	0	0	0	0	0	0	0	0	0	0	0	0	0	0	0	0	0	0	0	0	0	0	0	0	0	0	0	0	0	0	0	0
Proteiniphilum	0	0	0	0	0	0	0	0	0	0	0	0	0	0	0	0	0	0	0	0	0	0	0	0	0	0	0	0	0	0	0	0	0	0	0	0	0	0	0	0	0	0	0	0	0	0	0	0	0
Proteus	0.00091643	0	0	0	8.72791e-05	0	8.72791e-05	4.36395e-05	0.00170194	0	0	0	0.000130919	8.72791e-05	0	4.36395e-05	4.36395e-05	0.000218198	0.000567314	0	0	4.36395e-05	8.72791e-05	4.36395e-05	0	0	0	0.00192014	4.36395e-05	0	8.72791e-05	0	0	0	0	0	4.36395e-05	0	0	0	0	0	0	0	0.000654593	0.000218198	4.36395e-05	0	4.36395e-05
Providencia	0.0253109	0	4.36395e-05	0.000130919	0.0098189	0	4.36395e-05	0	0.000829151	0	0	0	0.000130919	4.36395e-05	4.36395e-05	0	0.000174558	0.00178922	0	0	0	0	0	0	0	0	0	0	0	0	0	0	0	0	0	0	0	0	0	0	0	0	0	0	0	0.000567314	0.00100371	0	4.36395e-05
Pseudoflavonifractor	0	0	0	0.000130919	0	0	0	0	0.0016583	0	0	0	4.36395e-05	0.000305477	0	0.000130919	0.000480035	0.000610954	0.00152738	0	8.72791e-05	0.000218198	0.000218198	8.72791e-05	8.72791e-05	4.36395e-05	4.36395e-05	0.00475671	8.72791e-05	0	0	0	4.36395e-05	0	0	0	0	0	0	0	0	0	0	0	0	0	8.72791e-05	4.36395e-05	0
Pseudomonas	8.72791e-05	0.193323	0.00261837	0.000610954	0.0540694	0.000741872	4.36395e-05	0	0.000480035	0	0	0	0.00109099	0	8.72791e-05	8.72791e-05	0.000174558	0.00336024	0.000480035	0.000130919	0.000392756	0.000130919	0.000523674	0.000130919	0.000698233	8.72791e-05	0	0.00117827	0.000436395	4.36395e-05	8.72791e-05	0	0.00096007	0.00392756	0.000872791	0.00192014	0.00453851	0.0014401	0.000305477	0.00480035	0.000218198	8.72791e-05	0.00117827	0.773904	0.00218198	0.000480035	0.0123936	0.000174558	0.00161466
Pseudoxanthomonas	0	0	0	0	0	0	0	0	0	0	0	0	0	0	0	0	0	0	0	0	0	0	0	0	0	0	0	0	0	0	0	0	0	0	4.36395e-05	0	0	0	0	0.000174558	0	0	0	0	0	0	0	0	0
Psychrobacter	0	0	0	0	0	0	0	0	0	0	0	0	0	0	0	0	0	0	0.0948287	0.118307	0	0	4.36395e-05	8.72791e-05	4.36395e-05	8.72791e-05	0.000567314	0	0.000349116	0.16775	0.000436395	0.000392756	0.000174558	0	0.000349116	0.000174558	0.000261837	0.000261837	0.224656	0.000349116	0.000130919	0.000174558	0.094916	0.000130919	0	0	0	0	0
Pyramidobacter	0	0	0	0	0	0	0	0	0	0	0	0	0	4.36395e-05	0	0	0	0	0.0806895	0.000872791	0.000218198	0.000305477	0.000567314	0.000130919	0.00213834	0.000872791	0.00100371	0.0469561	0.00109099	0	0	0	0	0	0	0	0	0.000174558	0.000829151	4.36395e-05	0	0	0	0	0	0	4.36395e-05	0	4.36395e-05
Ralstonia	0	0	0	0	0	0	0	0	0	0	0	0	0	0	0	0	0.000218198	0	0	8.72791e-05	0	8.72791e-05	0	0	4.36395e-05	0	0	4.36395e-05	0	0	0	8.72791e-05	0	0	4.36395e-05	0	0	4.36395e-05	0	4.36395e-05	4.36395e-05	0.000218198	0	0	0	0	0	0	0
Rheinheimera	0.0014401	0	0	0	8.72791e-05	0	0	0	0	0	0	0	0	0	0	0	4.36395e-05	4.36395e-05	0	0	0	0	0	0	0	0	0	0	0	0	0	0	0	0	0	0	0	0	0	0	0	0	0	0	0	0.000218198	0.00405848	0.000785512	0
Rhizobacter	0	0	0	0	0	0	0	0	0	0	0	0	0	0	0	0	0.000218198	0	0	0	0	0	0	0	0	0	0	0	0	0	0	0	0	0	0	0	0	0	0	0	0	0	0	0	0	0	0.000130919	0	0
Rhizobium	0	0	0	4.36395e-05	8.72791e-05	0	0	0	4.36395e-05	0	4.36395e-05	0	0.000261837	8.72791e-05	0	0.000130919	0.000261837	0.000829151	0.000218198	0	0.000218198	0	8.72791e-05	8.72791e-05	0	0	0	0	4.36395e-05	0	0	0	0	4.36395e-05	0	0	0	0	0.000130919	0	0	0	0	0	0	4.36395e-05	0.000261837	0.00130919	4.36395e-05
Rhodobacter	0	0	0	0	0	0	0	0	0	0	0	0	0	0	0	0	0	0	0	0	0	0	0	0	0	0	0	0	0	0	0	0	0	0	0	0	0	0	0	0	0	0	0	0	0	0	0	0	0
Rhodococcus	0.000436395	0	0	4.36395e-05	0	4.36395e-05	4.36395e-05	0	0.00205106	0	0	0	0.000349116	0.000130919	0	4.36395e-05	0.000261837	0.000174558	0	0	0	0	0	0	0	0	0	0	0	0	0	0	0	0	4.36395e-05	0	0	0	0	0	0	0	0	0	0	0.00174558	0.00109099	0.000654593	0
Roseburia	0.00488763	0	0	0.00100371	0.000305477	0.000610954	0	0	0.000436395	4.36395e-05	0	0	0.00091643	0.00309841	0.000130919	0.00336024	0.00859699	0.00680777	0	0	0	0	0	0	8.72791e-05	0	4.36395e-05	0.000130919	0.000130919	0.000610954	0	0	0	0	0	0	0	0	0	0	0	0	0	0	0	8.72791e-05	0.0016583	0.00104735	8.72791e-05
Roseococcus	0	0	0	0	0	0	0	0	0	0	0	0	0	0	0	0	0	0.00196378	0	0	0	0	0	0	0	0	0	0	0	0	0	0	0	0	0	0	0	0	0	0	0	0	0	0	0	0	0	4.36395e-05	0
Roseomonas	0	0	0	0	0	0	0	0	0	0	0	0	0	0	0	0	0	0	0	0	0	0	0	0	0	0	0	0	0	0	0	0	0	0	0	0	0	0	0	0	0	8.72791e-05	0	0	0	0	0	0	0
Rothia	0.00493127	0	0.000392756	0.00104735	0.0239581	0.00117827	0.0147065	0	0.0881955	8.72791e-05	0	0.000567314	0.0212961	0.0907266	0.00741872	0.00222562	0.0363954	0.00532402	0.0014401	0.00388392	0.00820423	0.00126555	0.00130919	0.0458652	0.00104735	0.000349116	8.72791e-05	0.000829151	0.0998473	0.00091643	4.36395e-05	0.00610954	0.000480035	0.0582151	0.0178049	0.00091643	0.000174558	0.00768056	0.00933886	0.0571678	0.00257473	0.00453851	0.113681	0.000872791	4.36395e-05	0.00122191	0.0311586	0.000523674	0.00615317
Rubellimicrobium	0	0	0	0	8.72791e-05	0	0	0	0	0	0	0	0	0	0	0	0	0	0	0	0	0	4.36395e-05	0	4.36395e-05	0	0	0	0	0	0	0	0	0	0	0	0	0	0	0	0	0	0	0	0	0	0	0	0
Ruminococcus	0.0056295	0	0.000174558	0.00589134	0.00235654	0.000610954	0	0	0.00126555	0	0	0.000130919	0.0016583	0.00362208	0.000349116	0.00388392	0.017674	0.00816059	0.0102553	8.72791e-05	0.000567314	0.00109099	0.000698233	0.000610954	0.00148374	0.000436395	4.36395e-05	0.0419812	0.000436395	0	0	0	0	0.000218198	0	0	0	0	0	0	0	0	0	0	0	0.000829151	0.00192014	0.00589134	0.000392756
Ruminococcus2	0.00336024	0	0	0.0041894	0.00240017	0.000829151	0	0	0.00100371	0	0	0	0.00253109	0.00235654	0.000305477	0.00340388	0.00816059	0.00872791	8.72791e-05	8.72791e-05	0	0	0	0	0	0	0	4.36395e-05	0	0	0	0	0	0	0	0	0	0	0	0	0	0	0	0	0	0.000480035	0.000741872	0.00322933	0.000261837
SR1_genera_incertae_sedis	0.00113463	0	4.36395e-05	0	0	0.000174558	0.000392756	4.36395e-05	0.00781148	0	0	4.36395e-05	4.36395e-05	0	0	8.72791e-05	0.000480035	0	0	0.000480035	0	0	0.000480035	0	0.000261837	0	4.36395e-05	4.36395e-05	0	0.000261837	0	4.36395e-05	0	0.000305477	0.000698233	0	0	0.000305477	0.000523674	0.000480035	8.72791e-05	0.000436395	0.000174558	0	0	0	0.00096007	0	0.000610954
Saccharibacteria_genera_incertae_sedis	0	0	0	0.000218198	0	0	0.000785512	0	0.00178922	0	0	4.36395e-05	0	0.000218198	0.000305477	4.36395e-05	0.000130919	8.72791e-05	0.000305477	0.00122191	0.000480035	8.72791e-05	8.72791e-05	0.00135283	0	8.72791e-05	0	0.00178922	0.000698233	0.000785512	0	0.00392756	8.72791e-05	0.000654593	0.00999345	0.000130919	0	0.00174558	0.00510583	0.00423304	0.00096007	0.00161466	0.0016583	8.72791e-05	0	0.000523674	0.00161466	0.00117827	0.000130919
Schwartzia	0	0	0	0	0	0	8.72791e-05	0	0	0	0	0	0	0	0	0	0	0	0.000480035	0	0	0	0	0	0	0	0	0	0	0	0	0	0	0	0	0	0	0	0	0	0	0	0	0	0	0	0	0	0
Sediminibacterium	0.000741872	0	0	0	0.000130919	8.72791e-05	0	0	0	0	0	8.72791e-05	0.000305477	0.000218198	0.000130919	8.72791e-05	0.00091643	0.00497491	0	0	0	0	0	0	0	0	0	0	0	0	0	0	0	0	0	0	0	0	0	0	0	0	0	0	0	0.000436395	0.000261837	0.00493127	4.36395e-05
Selenomonas	0	0	0	4.36395e-05	0	0	0.000305477	0	0.000785512	0	0	0	0	4.36395e-05	4.36395e-05	0	0	0	0.000480035	0.000130919	0.000130919	4.36395e-05	0	0.00170194	4.36395e-05	0	0	0.00091643	0.00096007	0.000174558	0	0.000480035	0	8.72791e-05	0.00178922	4.36395e-05	0	0.00288021	0.00122191	0.000523674	0.000436395	8.72791e-05	0	0	0.000872791	0	0.00122191	0	4.36395e-05
Serratia	0	0	4.36395e-05	0	0	0.000130919	8.72791e-05	0	0.000130919	0	8.72791e-05	0	0	0	0	0	0	0.000261837	0.000261837	4.36395e-05	0	0.000349116	4.36395e-05	4.36395e-05	8.72791e-05	0	0	8.72791e-05	0.000218198	0.000436395	0	0.000261837	0	0.000130919	0.000567314	4.36395e-05	4.36395e-05	4.36395e-05	0.0198123	0.000130919	8.72791e-05	0.000567314	0.000305477	0	0	0.000218198	0.000349116	0.000218198	0
Shewanella	0	0	0	0	0	0	0	0	0.000741872	0	0	0	0	0	0	0	0.000305477	0.000349116	0.000218198	0	4.36395e-05	0	0	0	0	4.36395e-05	4.36395e-05	0.000261837	0	0.000174558	0	0	0	4.36395e-05	0	0	0	0	0.0051931	0	0	0	4.36395e-05	0	0	0	0	0	0
Solobacterium	0.00322933	0	8.72791e-05	0.000305477	0.000218198	4.36395e-05	0.00890247	0	0.0135719	0	0	8.72791e-05	8.72791e-05	4.36395e-05	0.00109099	0.000261837	0.000654593	0.00117827	0.000174558	0.000610954	0.000130919	0.000130919	0.000218198	0.0235217	0.000174558	4.36395e-05	0	4.36395e-05	0.00785512	0.000698233	0	0.00130919	0.000130919	0.000218198	0.00501855	0	0	0.044425	0.00139647	0.0041894	0.000392756	0.000654593	0.00741872	4.36395e-05	0	0.000174558	0.0349553	0.00091643	0.000785512
Spartobacteria_genera_incertae_sedis	0	0	0	0	0	0	0	0	0	0	0	0	0	0	0	0	0.000174558	0	0	0	0	0	0	0	0	0	0	0	0	0	0	0	0	0	0	0	0	0	0	0	0	0	0	0	0	0	0	0.00174558	0
Sphingobium	0.000872791	0	0	0	0.000741872	0	0	0	0.000567314	0	0	0	0	0	0	0	0	8.72791e-05	0.000174558	0	0.000174558	0	8.72791e-05	4.36395e-05	8.72791e-05	0	0	0.00126555	0	0	0	0.000130919	0	8.72791e-05	8.72791e-05	0	0	4.36395e-05	0.000130919	0	0	0	0	0	0	0	0.000480035	4.36395e-05	0
Sphingomonas	0.0023129	0	0.000261837	0.000610954	0.00196378	0.000480035	0	0	0.00484399	0	0	0.000174558	0.00257473	0.00091643	0.000392756	0.000610954	0.00170194	0.007506	8.72791e-05	0	0.000130919	0.000130919	4.36395e-05	4.36395e-05	0	0	0	0.000218198	4.36395e-05	4.36395e-05	0	8.72791e-05	0	0.000261837	0.000305477	0	0	0.000130919	0.000610954	0.000872791	8.72791e-05	8.72791e-05	8.72791e-05	4.36395e-05	0	0.00658957	0.00711324	0.0120882	0.000218198
Sporobacter	0.000392756	0	0	0.000261837	4.36395e-05	8.72791e-05	0	0	4.36395e-05	0	0	0	0.000130919	0.000436395	4.36395e-05	0.000305477	0.00117827	0.0014401	4.36395e-05	0	4.36395e-05	0	0	0	0	0	0	0.000261837	0	0	0	0	0	0	0	0	0	0	0	0	0	0	0	0	0	0	0.000523674	4.36395e-05	0
Staphylococcus	0.00096007	0	0	0.00178922	0.00113463	0.000480035	0.000654593	0.00126555	0.00117827	0.00192014	0.000698233	8.72791e-05	0.00113463	0.00196378	8.72791e-05	0.0016583	0.0033166	0.00213834	0.000436395	0	0.00213834	0.00130919	0.553524	0.0014401	0.82182	0.00139647	0.00117827	0.00113463	0	0	0	8.72791e-05	0	0.000218198	0.000741872	0	0	0.000261837	0.000436395	0.000305477	4.36395e-05	8.72791e-05	0.000130919	0	0.00161466	0.00091643	0.000829151	0.00178922	0.000174558
Stenotrophomonas	0.0171067	4.36395e-05	0.000174558	0.00471307	0.00309841	0.00096007	0	4.36395e-05	0.00877155	0	0.000261837	0.000305477	0.00152738	0.00122191	0.000610954	0.000305477	0.00218198	0.0215143	0	0	4.36395e-05	0.000130919	0	0	4.36395e-05	0	0	0.000436395	0	0	0	0.0014401	0.000130919	0.000349116	0.0018765	0	0	0.000480035	0.00091643	0.00126555	0.000174558	0.000305477	8.72791e-05	0	0	0.00706961	0.00528038	0.0133101	0.000610954
Streptobacillus	0	0	0	0	0	0	0	0	0.000174558	0	0	0	0	4.36395e-05	0	0	0	0	0	0	0	0	0	0	0	0	0	0	0	0	0	0.00178922	8.72791e-05	0.000567314	0.00174558	0	0	0.000305477	0.000218198	0.000829151	0.000130919	0.000349116	0.000174558	0	0	0	0	0	0
Streptococcus	0.0197251	0.000174558	0.000610954	0.00506219	0.00881519	0.0229544	0.0531966	8.72791e-05	0.126467	0.000392756	0.000261837	0.00178922	0.0527166	0.569801	0.27746	0.0160593	0.112939	0.0256164	0.0586952	0.0484835	0.112895	0.0018765	0.00480035	0.0814314	0.00706961	0.00192014	0.00113463	0.0041894	0.378398	0.00392756	0.000130919	0.00864063	0.00196378	0.189046	0.0357844	0.000872791	8.72791e-05	0.300938	0.0221252	0.0661575	0.0123936	0.0096007	0.20192	0.00139647	0.00340388	0.00322933	0.232468	0.020947	0.0141392
Subdoligranulum	0	0	0	0	0	0	0	0	0	0	0	0	0	0	0	0	0	0	0.000218198	0	0	0	0	4.36395e-05	0	0	0	0.000349116	0	0	0	0	0	0	0	0	0	0	0	0	0	0	0	0	0	0	0	0	0
Tannerella	0	0	0	0.000218198	0	0	0.000785512	0	0	0	0	0	4.36395e-05	0	0	0	0	0	0.000436395	8.72791e-05	4.36395e-05	0	0	0.000174558	4.36395e-05	0	0	0.00157102	0	4.36395e-05	0	4.36395e-05	0	4.36395e-05	0.000610954	0	0	4.36395e-05	0.000174558	4.36395e-05	8.72791e-05	0	0	0	0	0	4.36395e-05	0	0
Terrimonas	0	0	0	0	0	0	0	0	0	0	0	0	0	0	0	0	0	0	0	0	0	0	0	0	0	0	0	0	0	0	0	0	0	0	0	0	0	0	0	0	0	0	0	0	0	0	0	0	0
Thermaerobacter	0.000741872	0	0	0.000174558	0	4.36395e-05	0	0	0.00274929	0	4.36395e-05	0.000130919	0.000218198	0.00148374	0.000872791	0.000392756	0.000305477	0.00178922	0	0	0	0	0	0	0	0	0	0	0	0	0	0	0	0	0	0	0	0	0	0	0	0	0	0	0	0.000610954	0.00226926	0.00226926	0.000174558
Treponema	0	0	0	0	0	0	0	0	8.72791e-05	0	0	0	0	0	0	0	0	0	0	0	0	0	0	0	0	0	0	8.72791e-05	0	0.000218198	0	0.000436395	0	0.000436395	0.00200742	0	0	0.000305477	0.00152738	0.00096007	0.000174558	0.000436395	0	0	0	0	0	0	0
Turicibacter	0	0	0	0	0	0	0	0	0	0	0	0	0	0	0	0	0	0.0014401	0.000436395	0	0.000174558	8.72791e-05	4.36395e-05	4.36395e-05	0.000261837	4.36395e-05	0	0.00292385	0	0	0	0	0	0	0	0	0	0	0	0	0	0	0	0	0	0	0	0	0
Unclassified_Actinobacteria	0	0	0	0	0	0	0	0	0	0	0	0	0	0	0	0	0	0	0	0	0	0	0	0	0	0	0	0	0	0	0	0	0	0	0	0	0	0	0	0	0	0	0	0	0	0	0	0.00091643	0
Unclassified_Actinomycetales	0.00100371	0	0	0.000305477	0.000174558	8.72791e-05	0	0	0.00109099	0	4.36395e-05	0.000130919	0.00130919	0.000654593	0.000654593	0.000523674	0.00288021	0.000829151	0	0	0	0	0	0	0	0	0	0	0	0	0	0	0	0	0	0	0	0	0	0	0	0	0	0	0	0.000174558	0.000610954	0.00362208	0.000218198
Unclassified_Alphaproteobacteria	0.00096007	0	0	0	0	0	0	0	0	0	0	0	0	0	0	0	0	0	0	0	0	0	0	0	0	0	0	0	0	0	0	0	0	0	0	0	0	0	0	0	0	0	0	0	0	0	0	0	0
Unclassified_Anaerolineaceae	0.000349116	0	0	0	0	0	0	0	0	0	0	0	0	0	0	0	0	0	0	0	0	0	0	0	0	0	0	0	0	0	0	0	0	0	0	0	0	0	0	0	0	0	0	0	0	0	0	0	0
Unclassified_Bacteria	0.437094	0.000436395	0.00305477	0.0137028	0.183679	0.00868427	0.00170194	8.72791e-05	0.0917739	0	0.000130919	0.00157102	0.0624045	0.054724	0.0102553	0.0950033	0.0708706	0.134846	0.000610954	0.0124809	0.00261837	0.000741872	0.0152738	0.00283657	0.0058477	0.00318569	4.36395e-05	0.0201178	0.0114336	0.00213834	4.36395e-05	0.0135719	4.36395e-05	0.0116518	0.0126991	4.36395e-05	0.000130919	0.00270565	0.00554222	0.00349116	0.00240017	0.000392756	0.00314205	4.36395e-05	0.000261837	0.0265328	0.109055	0.325769	0.0545931
Unclassified_Bacteroidales	0	0	0	0	0	0	0	0	0.000218198	0	0	0	0	0	0	8.72791e-05	0.000218198	0	8.72791e-05	0	0	0	4.36395e-05	0	0	0	0	0.00104735	4.36395e-05	0	0	0.000567314	0	0	0.000174558	0	0	0.000130919	4.36395e-05	0.000261837	4.36395e-05	0	8.72791e-05	0	0	0	0	0.00122191	0
Unclassified_Bacteroidetes	0	0	0	0	0	0	0	0	0	0	0	0	0	0	0	0	0	0	0	0	0	0	0	0	0	0	0	0	0	0	0	0.000436395	0	0	8.72791e-05	0	0	8.72791e-05	4.36395e-05	0	4.36395e-05	0	0	0	0	0	0	0	0
Unclassified_Betaproteobacteria	0	0	0	0	0	0	0	0	0	0	0	0	0	0	0	0	0	4.36395e-05	0	0	0	0	0	0	0	0	0	0	0	0	0	0	0	0	0	0	0	0	0	0	0	0	0	0	0	0	0.00091643	0.00222562	0
Unclassified_Bradyrhizobiaceae	0.000654593	0	0	0	0	0	8.72791e-05	0	0.000218198	0	0	8.72791e-05	0.000392756	8.72791e-05	0	8.72791e-05	0.000654593	0.000480035	0	0	0	0	0	0	0	0	0	0	4.36395e-05	0	0	0	0	0	0.000130919	0	0	4.36395e-05	0	4.36395e-05	0	0	4.36395e-05	0	0	0.000567314	0.000523674	0.00196378	0.000130919
Unclassified_Brucellaceae	0.0110844	0	0.000130919	0.00336024	0.00305477	0.00096007	8.72791e-05	0.000174558	0.00698233	4.36395e-05	0.000130919	0.00161466	0.0117827	0.0093825	0.00624045	0.00218198	0.0276238	0.0470434	0	0	0	8.72791e-05	0	4.36395e-05	0.000174558	0.0329042	4.36395e-05	0	4.36395e-05	0	0	0	0	0	0	0	0	0	0	0	0	4.36395e-05	0	0	0	0.0056295	0.00576042	0.0591752	0.00314205
Unclassified_Burkholderiales	8.72791e-05	0	0	0	0	0	0	0	0	0	0	0	0	0	0	0	0	0	0	0	0	0	0	0	0	0	0	0	0	0	0	0	0	0	0	0	0	0	0	0	0	0	0	0	0	0	0	0	0
Unclassified_Chitinophagaceae	0	0	0	0	0	0	0	0	0	0	0	0	0	0	0	0	0	0	0	0	0	0	0	0	0	0	0	0	0	0	0	0	0	0	0	0	0	0	0	0	0	0	0	0	0	0	0	0	0
Unclassified_Chloroflexi	0	0	0	0	0	0	0	0	0	0	0	0	0	0	0	0	0	0	0	0	0	0	0	0	0	0	0	0	0	0	0	0	0	0	0	0	0	0	0.000872791	0	0	0	0	0	0	0	0	0.00279293	0
Unclassified_Clostridiaceae_1	0	0	0	0	0	0	0	0	0	0	0	0	0	0	0	0	0	0	8.72791e-05	0	0	0	0	0	0	0	0	0.000218198	0	0	0	0	0	0	0	0	0	0	0	0	0	0	0	0	0	0	0	0	0
Unclassified_Clostridiales	0.00545494	0	0	0.000698233	0.00261837	8.72791e-05	0.000305477	0	0.000261837	0	0	0	0.000218198	0.000174558	0.000174558	0.000392756	0.00096007	0.00266201	0.00139647	0	0.00270565	0	0.000261837	0.000436395	0.000174558	8.72791e-05	0	0.00549858	4.36395e-05	0	0	4.36395e-05	0.00170194	0.000305477	0.000785512	0	0	4.36395e-05	0.000174558	0	0.000130919	0.000261837	4.36395e-05	0	0	4.36395e-05	0.000174558	0.000130919	0.000174558
Unclassified_Clostridiales_Incertae_Sedis_XI	0	0	0	0	0	0	8.72791e-05	0	0	0	0	0	0	0	0	0	0	0	0	0	0	0	0	8.72791e-05	0	0	0	0	0	0	0	0	0	0	0.000349116	0	0	0	0.000261837	0.000130919	0	0.000218198	0	0	0	0	0	0	0
Unclassified_Comamonadaceae	0	0	0	0.000436395	0	0	0	0	8.72791e-05	0	0	0	0	0	0	0	0	0	0	0	0	0	0	0	0	0	0	0	0	0	0	0	0	0	0	0	0	0	0	0	0	0	0	0	0	0	4.36395e-05	0	0
Unclassified_Corynebacteriaceae	0	0	0	0	0	0	0.000130919	0	0	0	0	0	4.36395e-05	0	0	0	0	0	4.36395e-05	0	0	0	0	0	0	0	0	8.72791e-05	0	8.72791e-05	0	0.000436395	0	4.36395e-05	0.000698233	0	4.36395e-05	0.000130919	0.000654593	0.000261837	0	0.000305477	0	0	0	0	0	0	0
Unclassified_Deltaproteobacteria	0	0	0	0	0	0	0	0	0	0	0	0	0	0	0	0	0	0	0	0	0	0	0	0	0	0	0	0	0	0	0	0	0	0	0	0	0	0	0	0	0	0	0	0	0	0	0	0	0
Unclassified_Desulfovibrionaceae	0.00117827	0	0	0.00139647	0.000174558	4.36395e-05	0	0	0.000174558	0	0	0	0	0.000480035	0	0.000698233	0.00213834	0.00213834	0.00301113	0	0	8.72791e-05	8.72791e-05	0.000130919	0.000174558	0	0	0.0103426	0	4.36395e-05	0.000130919	0	0	0	0	0	8.72791e-05	0	0	0	4.36395e-05	0	0	0	0	0	0	0	0.000218198
Unclassified_Desulfovibrionales	0	0	0	0	0	0	0	0	0	0	0	0	0	0	0	0	0	0	0	0	0	0	0	0	0	0	0	0	0	0	0	0	0	0	0	0	0	0	0	0	0	0	0	0	0	0	0	0	0
Unclassified_Enterobacteriaceae	0.00720052	0.00309841	0.00130919	0.00698233	0.0056295	0.0765874	0.00279293	0.0072878	0.0353044	0.342439	0.380711	0.00427667	0.00711324	0.00292385	0.00301113	0.0226926	0.0144883	0.0299804	0.00907702	0.000349116	0.104168	0.00244381	0.000130919	0.00109099	0.000305477	0.044556	0.000305477	0.00126555	0	0.000218198	0.000741872	0.000567314	0.00676413	0.00196378	0.000174558	0.000130919	0.00122191	0	0.000829151	0.000130919	0.000218198	0.00868427	0.000261837	4.36395e-05	0.246258	0.0661575	0.044556	0.172463	0.0990617
Unclassified_Firmicutes	0	0	0	0	0	0	0	0	0	0	0	0	0	0	0	0	8.72791e-05	0	0	0	0	0	0	0	0	0	0	0	0	0	0	0	0	0	0	0	0	0	0	0	0	0	0	0	0	0	0	0	0
Unclassified_Flavobacteriaceae	0	0	0	0	4.36395e-05	0	0.000130919	0	8.72791e-05	0	0	0	0	0	0.000436395	4.36395e-05	0	0	0.000436395	0.000872791	0	0	0	0.00091643	0	0	0	0	4.36395e-05	8.72791e-05	0	0.000174558	0	8.72791e-05	0.00104735	0	0	0.000174558	0.000567314	0.000218198	8.72791e-05	0.000523674	4.36395e-05	0	0	0	0	0	0
Unclassified_Lachnospiraceae	0.00117827	0	0	0.00881519	0.00244381	0.000523674	8.72791e-05	0	0.00506219	4.36395e-05	4.36395e-05	0	0.00305477	0.00427667	0.000305477	0.00619681	0.0186777	0.0174122	0.0250491	0.000261837	0.00100371	0.00248745	0.00109099	0.0016583	0.00388392	0.00130919	8.72791e-05	0.090683	0.000829151	4.36395e-05	4.36395e-05	4.36395e-05	0	0.000654593	8.72791e-05	0	0	0	4.36395e-05	4.36395e-05	0	0	4.36395e-05	0	0	0.000610954	0.00340388	0.003753	0.000654593
Unclassified_Lactobacillales	0	4.36395e-05	0.000130919	0	0	0	0	0	0	0	0	0	4.36395e-05	0.000130919	0.000130919	0	0	0	0	0	0	0	0	0	0	0	0	0	0	0	4.36395e-05	0	0	0	0	0	0	0.00109099	0	0	0.000130919	0	0	0	0	0	0	0	0
Unclassified_Leptotrichiaceae	0	0	0	0	0	0	0	0	0	0	0	0	4.36395e-05	0	0	0	0	0	0	0	0	0	0	0	0	0	0	0	0	0	0	0.000392756	0	4.36395e-05	0.000436395	0	0	0.000130919	0.000480035	0.000349116	0	0	0	4.36395e-05	0	0	0	0	0
Unclassified_Myxococcales	0	0	0	0	0	0	0	0	8.72791e-05	0	0	0	0	4.36395e-05	0	0	0	0	0	0	0	0	0	0	0	0	0	0	0	0	0	0	0	0	0	0	0	0	0	0	0	0	0	0	0	0	0.000523674	0.000698233	0
Unclassified_Pasteurellaceae	4.36395e-05	0	0	0	0	0	0	0	0.0131791	0	0	0	0	0	0	8.72791e-05	0.000174558	0.000305477	4.36395e-05	0	0	4.36395e-05	0.00122191	0	0.00130919	0	0	8.72791e-05	0	0	4.36395e-05	0.000436395	0	8.72791e-05	0.00240017	4.36395e-05	0	0.000305477	0.000872791	0.000785512	0.000218198	0.000480035	0	0	0	0	0	8.72791e-05	4.36395e-05
Unclassified_Peptococcaceae_1	0	0	0	0	0	0	0	0	0	0	0	0	0	4.36395e-05	0	4.36395e-05	0.000436395	0	0	0	0	0	0	0	4.36395e-05	0	0	0.00122191	0	0	0	0	0	0	0	0	0	0	0	0	0	0	0	0	0	0	0	0	0
Unclassified_Phyllobacteriaceae	8.72791e-05	0	0	0.000130919	0	0	0	0	0.000567314	0	0	0	8.72791e-05	0.000174558	0.000218198	8.72791e-05	0.000130919	0.00113463	0.00785512	0.00789876	0.00174558	0.0129609	0.00968798	0.00113463	0.00466943	0.00117827	0.000130919	0.007506	0.00178922	0.00868427	0.000174558	0.022998	0.000261837	0.0165394	0.013441	0.000567314	0.000261837	0.00445123	0.00274929	0.003753	0.00100371	0.0329479	0.00410212	8.72791e-05	0	0.000349116	0	4.36395e-05	0.000130919
Unclassified_Porphyromonadaceae	0.000392756	0	0	0.00148374	4.36395e-05	0	0	0	0.000130919	4.36395e-05	0	0	0.000523674	0.000610954	0	0.000392756	0.00244381	0.00122191	0.0111717	8.72791e-05	0.000610954	0.00091643	0.000392756	0.000698233	0.00096007	0.000349116	8.72791e-05	0.0367445	0.000610954	0	0	0	0	8.72791e-05	0.000130919	0	0	0	4.36395e-05	0	0	0	0	0	0	0	0.00126555	0.000610954	8.72791e-05
Unclassified_Prevotellaceae	4.36395e-05	0	0	8.72791e-05	0	0	0	0	0	0	0	0	0	0	0	4.36395e-05	0	0	0.0014401	4.36395e-05	4.36395e-05	4.36395e-05	0	0	0.000174558	0	0	0.00392756	0	0	0	0	0	0	0	0	0	0	0	0	0	0	0	0	0	0	4.36395e-05	0	0
Unclassified_Proteobacteria	0.000829151	0	0	0	0	0	0	0	0	0	0	0	0	0	0	0	0	0	0	0	0	0	0	0	0	0	0	0	0	0	0	0	0	0	0	0	0	0	0	0	0	0	0	0	0	0	0	0	0
Unclassified_Rhizobiales	0	0	0	0	0	0	0	0	4.36395e-05	0	0	0	0	0	0	0	0	0	0	0	0	0	0	0	8.72791e-05	0	0	0	0	0	0	0	0	0	0	0	0	0	0	0	0	0	0	0	0	0.000261837	0	4.36395e-05	0
Unclassified_Rhodobacteraceae	0	0	0	0	4.36395e-05	0	0	0	0.00096007	0	0	0	0	0	0	0	0.000174558	0	4.36395e-05	0	0	0	0	4.36395e-05	0	0	0	0.000174558	0	0	0	0	0	0	0	0	0	0	0	0	0	0	0	0	0	0	0	0	0
Unclassified_Rhodocyclaceae	0	0	0	0	0	0	0	0	0	0	0	0	0	0	0	0	0	0	0	0	0	0	0	0	0	0	0	0	0	0	0	0	0	0	0	0	0	0	0	0	0	0	0	0	0	0	0	0	0
Unclassified_Ruminococcaceae	0.0234781	0	8.72791e-05	0.00139647	0.00388392	0.000174558	0.000218198	0	0.00117827	0	0	4.36395e-05	0.000523674	0.00100371	0.000392756	0.00170194	0.00462579	0.00458215	0.0121318	0.000261837	0.000654593	0.00117827	0.000698233	0.000654593	0.00122191	0.000349116	4.36395e-05	0.0407593	0.00305477	8.72791e-05	0	4.36395e-05	4.36395e-05	8.72791e-05	0.0020947	8.72791e-05	0	0.000305477	0.000436395	0.000829151	8.72791e-05	0.000785512	0.000349116	0	0	0.000392756	0.000567314	0.000872791	0.000523674
Unclassified_Sutterellaceae	0	0	0	0	0	0	0	0	0	0	0	0	0	0	0	0	0	0.000698233	0	4.36395e-05	0	0	0	0	0	0	0	0	0	0	0	0	0	0	0	0	0	0	0	0	0	0	0	0	0	0	0	0	0
Unclassified_Synergistaceae	0	0	0	0	0	0	0	0	0	0	0	0	0	0	0	0	0	0	0.00366572	4.36395e-05	4.36395e-05	0	0	4.36395e-05	0	0	0	0.000741872	0	0	0	0	0	0	0.000261837	0	0	0.000130919	0.000174558	0	0	0	8.72791e-05	4.36395e-05	0	0	0	0	0
Unclassified_Veillonellaceae	0	0	0	0	0	0	0	0	0	0	0	0	0	0	0	0	0	0	0	0	0	0	0	0	0	0	0	0	0	4.36395e-05	0	8.72791e-05	0	0	0.000174558	0	0	0	0.000174558	0	0	0	0	0	0	0	0	0	0
Unclassified_Xanthobacteraceae	0	0	0	0	0	0	0	0	0	0	0	0	0	0	0	0	0	0	0	0	0	0	0	0	0	0	0	0	0	0.000130919	0	0	0	0	0	0	0	0	0	0	0	0	0	0	0	0	0	0	0
Vampirovibrio	0	0	0	0	0	4.36395e-05	0	0	0.000436395	0	0	4.36395e-05	0	0	0	8.72791e-05	0.000130919	0.000130919	0	0	0	0	0	0	0	0	0	0	0	0	0	0	0	0	0	0	0	0	0	0	0	0	0	0	0	0.000480035	0	0	0
Veillonella	0.00135283	8.72791e-05	0.000130919	0.00322933	0.0398865	0.00218198	0.0102553	0	0.03801	4.36395e-05	8.72791e-05	0.000305477	0.00776784	0.0227362	0.00440759	0.0111281	0.0398865	0.0191141	0.0039712	0.00436395	0.000349116	0.000610954	0.000436395	0.0824787	0.00104735	0.000436395	0.00702597	0.00213834	0.0747109	0.00091643	8.72791e-05	0.00318569	0.000218198	0.00632773	0.0150993	0.000130919	8.72791e-05	0.0368318	0.00693869	0.0774602	0.00183286	0.00205106	0.0326424	0.000872791	0.0700415	0.000392756	0.00855335	0.00135283	0.00344752
Vibrio	0	0	0	0.000261837	0	0	0	0	0	0	0	0	0	0.000218198	0	0.000349116	0.000567314	0.000523674	0	0	0	0	0	0	0	0	0	0	0	0	0	0	0	0	0	0	0	0	0	0	0	0	0	0	0	0	0	0	4.36395e-05
Weissella	0	0	0	4.36395e-05	0	0	0	0	0.000174558	0	0	0	0	8.72791e-05	0	0	4.36395e-05	0.000261837	0	0	0	0	0	0	0	0	0	4.36395e-05	0	0	0	0	0	0	0	0	0	0	0	0	0	0	0	0	0	0	0	0	0
Wolinella	0	0	0	0	0	0	0	0	0	0	0	0	0	0	0	0	0	0	0	0	0	0	0	0	0	0	0	0	0	0	0	0	0	0	8.72791e-05	0	0	0	0.000218198	0	0	0	0	4.36395e-05	0	0	0	0	0
[truncated: 19 more columns]
